# Supplementary material for: The effect of natural infrastructure on water erosion mitigation in the Andes
Source: Copernicus journal article supplement (doi:10.5194/soil-8-133-2022), 2022-02-28
Supplement: Supplementary file 1 [file Supplement A.docx]

## Supplement A

## . Definitions of terms used in the systematic review (in English and Spanish)

**Vegetation Protection (*Vegetación protectora*)**

**Conservation and management of native forest** (*Conservación y manejo de bosque nativo*)

Forest management and conservation comprise the decisions and activities aiming at sustainable use of forest resources, seeking to satisfy the needs of today's society without compromising the provision of goods and services for future generations

*El manejo y la conservación forestal comprende las decisiones y actividades encaminadas al aprovechamiento de los recursos forestales de manera ordenada, procurando satisfacer las necesidades de la sociedad actual, sin comprometer la provisión de bienes y servicios para las generaciones futuras (Aguirre-Calderón, 2015)*

**Agrosilvopastoral systems** (*Sistemas agrosilvopastoriles*)

Agrosilvopastoral systems are associations of trees (for timber or fruit production) with cattle ranging with or without the presence of crops. They are found in different farming systems from large-scale agro-industry with commercial tree plantations and presence of livestock to small-scale subsistence farming where they are a complement to traditional farming systems.

*Los sistemas agrosilvopastoriles, son asociaciones de árboles maderables o frutales con animales, con o sin la presencia de cultivos. Son practicados a diferentes niveles, desde las grandes plantaciones arbóreas-comerciales con inclusiones de ganado como complemento a la agricultura de subsistencia* *(Musálem, 2002).*

**Afforestation** (*Afforestación)*

Afforestation is the establishment of forest by means of plantation and/or planned seeding on land that has not been under forest before.

*Establecimiento de bosque mediante plantación y/o siembra deliberada en tierra que, hasta ese momento, no ha sido clasificada como bosque (FAO, 2010).*

**Reforestation** (Reforestación)

Reestablishment of forest cover by means of plantation and/or planned seeding on land that has been under forest before.

*Reestablecimiento de bosque mediante plantación y/o siembra deliberada en tierra clasificada como bosque (FAO, 2010).*

**Control of grazing land** (*Control de pastoreo*)

It refers to the regulation of grazing density and intensity by the regulation of the frequency and volume of grazing in order to control the consumption, quality, yield and persistence of forage in a pastureland.

*Se refiere a la regulación tanto de la frecuencia como el volumen que se debe pastorear para controlar el consumo, la calidad, el rendimiento y la persistencia del forraje en un potrero*.

**Itinirant corrals** (*Corrales itinerantes*)

This is an ancient Andean practice for livestock management and soil manuring, and is carried out during the rainy season in headwater basins. This technology is part of the ancient Andean farming systems and is interrelated with other aspects of farming to optimize the use of space and time based on ecological zones, production areas and available labor.

*Constituye una tecnología andina de manejo de ganado y de abonamiento de suelos, práctica realizada durante la época lluviosa en zonas de cabecera. Esta tecnología se interrelaciona con otros aspectos de la vida campesina para la optimización del uso del espacio y el tiempo en función de los pisos ecológicos, las zonas de producción y la mano de obra disponible* *(Morales, 1993)*.

**Natural grasslands: puna and páramo grassland** (*Pasto natural: puna y páramo*)

Natural grasslands can be found in Andean regions at high altitude and/or with low rainfall. The conservation of natural grasslands, such as the puna or paramo grasslands, is part of an ancient Andean conservation practise whereby the density of livestock is regulated.

*En las zonas andinas, se encuentra pastos naturales en la alta montaña y/o en regiones con baja pluviosidad. La conservación de los pastos naturales, como la puna o el paramo, es parte de un sistema tradicional de conservación en el cual la densidad del ganado es regulado.*

**Wetlands** (*Bofedal*)

A bofedal is a highland wetland, and is considered a small native grassland under permanent moisture. The vegetation or plants that inhabit the wetland are called "hydrophytic vegetation". Wetlands are formed in areas such as the Andean massif located at an atitude over 3800 m, where the plains store water from rainfall, melting glaciers and groundwater flow.

*Un bofedal es un humedal de altura, que se encuentra en las zonas andinas. Es una pradera nativa que es poco extensa y con permanente humedad. Los vegetales o plantas que habitan el bofedal reciben el nombre de "vegetales hidrofíticos". Los bofedales se forman en las zonas cóncavas donde se acumula el agua proveniente de precipitaciones pluviales, deshielo de glaciares y afloramientos superficiales de aguas subterráneas.*

**Elements of water regulation (*Elementos de regulación hídrica*)**

**Channels and dikes** *(Canales y diques*)

**Dikes and channels are hydraulic structures. A dike** is a human-made construction, perpendicular to direction of the river channel. By obstructing the channel, it retards the flow of water. It is typically made of soil, stone masonry, or concrete. **Channels are narrow human-made constructions that aim to divert water from the main river channel to other spaces like agricultural terraces, reservoirs, or infrastructure.**

***Diques y canales son construcciones hidráulicas. El dique es una*** *construcción perpendicular a la dirección principal del rio. Por medio de una obstruccion del lecho del rio, el dique retiene el agua. Es típicamente construido de tierra, mampostería de piedra, u hormigón. C****anales:*** *son conductos de agua estrechos por los cuales se redirecciona el agua del rio hacia otros espacios como terrazas agrícolas, reservorios o infraestructura.*

**Artificial lakes** (*Lagunas artificiales*)

A lake is an accumulation of water in a topographic low. In general, its freshwater gives rise to a varied flora and fauna both in its terrestrial surroundings and in the lake. Lakes can be natural or artificial. Human-made lakes are constructed for different purposes: water reservoirs for irrigation of crops, or the generation of hydro-power.

*Una laguna es una acumulación de agua en una depresión topografica. Por lo general sus aguas son dulces y dan lugar a una variada flora y fauna tanto en sus inmediaciones terrestres como desde el punto de vista acuático. Las lagunas se forman de manera natural o artificial. Las lagunas antropogénicas sirven para diferentes objetivos: reservorios de agua para irrigación de cultivos o la generación de energía hidroeléctrica.*

**Infiltration ditches** (*Zanja de infiltración*)

The infiltration ditches are excavations that are made on the land in the form of channels of rectangular or trapezoidal section, which are built at contour lines to stop surface runoff and store water for the pastures and crops planted under the ditches

*Las zanjas de infiltración son excavaciones que se realizan en el terreno en forma de canales de sección rectangular o trapezoidal, que se construyen a curvas de nivel para detener la escorrentía de las lluvias y almacenar agua para los pastos y cultivos instalados debajo de las zanjas* *(MINAGRI, 2014).*

**Q'ochas o Q'otas** (*Q'ochas o Q'otas*)

They are geometric excavations which form large extended holes that allow the water harvesting and production in arid areas, minimizing the risks of frost and droughts in the Andean ecological system.

*Excavaciones geométricas formando grandes hoyos extendidos que posibilitan la cosecha de agua de lluvia y la producción en zonas áridas, minimizando los riesgos de heladas y sequias en el sistema ecológico andino* *(Chilón, 2011)*.

**Q'otañas**  *(Q'otañas)*

Reservoirs built in the water collection areas of the micro-catchments, in order to "harvest" rainwater which is then used in irrigation, for drinking water and domestic use. They facilitate rainwater harvesting in the wet season, and they increase the soil humidity in their surroundings favouring the growth of native vegetation.

*Reservorios construidos en el área de recolección de agua de las microcuencas, con la finalidad de “cosechar” el agua de las precipitaciones, para utilizarlas racionalmente en el riego, como abrevaderos y para uso doméstico. Permitirá la cosecha de agua de lluvia en la época húmeda, y guardar la humedad en los alrededores favoreciendo al repoblamiento de pastos nativos* (Chilón, 2011)

**Suka kollus or ridges** (*Suka kollus o camellones*)

Andean cropping system with raised fields or cultivable ridges, whose height was artificially lifted. The fields or ridges are interspersed with channels through which the water flows. This system has two benefits: it harvest water and favours agricultural production by improving the soil thermal balance. Etymologically Suka means = Furrow or Crop, Kollu = heap, hill

*Sistema de cultivos andinos, con campos elevados o camellones cultivables, cuya altura se aumento de forma artificial. Los campos o camellones están intercalados con canales por los que circula el agua. Tiene dos beneficios: cosecha de agua, y mejoramiento de la producción agrícola por medio de un sistema de balance térmico del suelo. Etimológicamente significa Suka=Surco o Cultivo, Kollu=montón, amontonamiento, cerro* *(Chilón, 2011).*

**Hills and embankments** (*Lomas y terraplenes*):

They are hydraulic systems that are built to prevent excess water by means of drainage systems, artificial islands, channels and dikes, and settlements in the upper parts.

*Son sistemas hidráulicos desarrollados para contrarrestrar el exceso de agua por medio de sistemas de drenaje, islas artificiales, canales y diques, y asentamientos en las partes altas* *(Chilón, 2011)*.

**Drainage sytems** (*Sistemas de drenaje*)

They consist of eliminating excess water and decreasing water table, which in turn enhance aeration, root distribution, and access to nutrients. They also facilitate the removal of salts and prevent re-salinization of soils.

*Consisten en eliminar el exceso de agua deprimiendo los niveles freáticos, mejorando la aireación, la exploración radicular, y el acceso a nutrientes. También facilita la remoción de sales y evita la resalinización de los suelos* *(Liotta et al., 2015).*

**Ancestral irrigation** (*Riego ancestral*)

Ancient irrigation systems were developed by traditional Andean cultures. The irrigation practices were adapted to steep slopes, giving rise to very particular irrigation techniques that are still practiced today.

*Sistemas de riego ancestral han sido desarrollados por las culturas tradicionales andinas. Las prácticas de riego eran adaptadas a las grandes pendientes dando lugar a técnicas muy particulares que aún hoy día se practican* *(Moreno-Pérez et al., 2016)*.

**Tarasukas** (*Tarasukas*)

It is a variation of the sukakollus. It consists of double furrows built in narrow ridges, surrounded by sukahumas or watercourses built in inundated áreas.

*Es una variante de los sukakollus. Consiste en surcos dobles habilitados en camellones angostos, rodeados de sukahumas o canales de agua construidos en áreas inundables* *(Chilón, 2011)*.

**Practices/Soil conservation works *(Prácticas/Obras de conservación de suelos)***

**Checkdams** (*Gaviones*)

Checkdams are human-made barriers constructed in the channel of small (ephemeral) rivers and gullies. They are build perpendicular to the gully channel, with the aim to retard the runoff water and to retain sediments. They permit to control the magnitude and velocity of the concentrated runoff.

*Los gaviones son barreras antropogénicas construidas en el canal de ríos ephemericos y carcavas. Los gaviones son construidos perpendicular al canal de la cárcava con la intención de retardar el flujo superficial de agua y retener los sedimentos. Ellos permiten de controlar el nivel y velocidad del agua y retener sedimentos (Talca, 2003).*

**Contour furrows** (*Surcos en curvas a nivel*)

They are furrows that are built in a parallel direction to the contour lines so that they can retain, maintain and enhance infiltration of rainwater on the slopes. For this reason, they are recommended for areas with low rainfall: dry tropics and subtropics.

*Son canales que se construyen a nivel, en dirección transversal a la pendiente, para retener, conservar y ayudar a infiltrar el agua de lluvia que cae sobre las laderas. Por esta razón se recomiendan para zonas con baja precipitación lluviosa: trópico seco y subtrópico seco*.

**Infiltration ditches** *(Zanjas de infiltración)*

The infiltration ditches are ditches on agricultural land, with excavations in the form of channels of rectangular or trapezoidal cross-section. They are built in a parallel direction to the contour lines to retard surface runoff, enhance infiltration and water storage for the pastures and crops planted under the ditches.

*Las zanjas de infiltración son excavaciones que se realizan en el terreno en forma de canales de sección rectangular o trapezoidal, que se construyen a curvas de nivel para detener la escorrentía de las lluvias y almacenar agua para los pastos y cultivos instalados debajo de las zanjas* *(MINAGRI, 2014).*

**Agricultural terraces** *(taqanas, quillas y chullpa tirquis)*

Agricultural terraces are built on sloping land. The construction of terraces allows to reduce the slope gradients of the agricultural parcels, to reduce soil erosion and enhance water infiltration in the parcel. These terraces can be limited by vegetation barriers, soil mounds or stone walls, and formed as slow-forming terraces as a result of tillage erosion.

*Las terrazas agrícolas son las taqanas, andenes, quillas, chullpa tirquis o pata patas que están en las laderas. La construcción de las terrazas permite de reducir la pendiente local de la parcela agrícola, y reducir la erosion de suelo y mejorar la infiltración de agua en la parcela. Las terrazas pueden ser limitadas por barreras de vegetación, acumulaciones de tierra o muros de piedra, y se forman lentamente como el resultado de erosion por labranza (Mamani and Ballivián, 2008).*

**Buffer strips** (*Faja marginal*)

Buffer strips are forming a buffer between the terrestrial and aquatic environments. Typically, they can be found around water bodies, river channels and gullies. They fulfill hydrological and ecological functions as they reduce the sediment transfer to the river system and/or preserve the stability of the river banks.

*Se define como la zona de transición entre el medio acuático y terrestre, alrededor del cauce o álveo de un cuerpo de agua. Esta zona cumple funciones como el mantenimiento de la integridad hidrológica como ecológica capaz de reducir la erosión y/o conservar la estabilidad de los cauces* (*Tingo, 2014)*.

**Soil management** (organic fertilizers, mulch) (*Manejo de suelos (mulch, abonos orgánicos)*)

Soil management practices are agronomic techniques that aim to increase the productivity on the agricultural parcels. Sustainable soil management techniques include the implementation of conservation measures to prevent or reduce soil erosion and salinity; improve soil drainage; and to maintain or enhance soil fertility.

Son prácticas agronómicas a nivel local que mantienen o aumentan la capacidad productiva de la tierra en áreas afectadas por o propensas a la degradación. Prácticas sustentables de manejo de suelo incluyen la prevención o la reducción de la erosión del suelo, consolidación y la salinidad; la conservación o drenaje del suelo; el mantenimiento o mejoramiento de la fertilidad del suelo *(FAO, 2000)*.

**Conservation tillage** (*Labranzas de conservacion*)

Conservation tillage resume different types of alternative tillage systems, from reduced tillage such as minimum tillage and no tillage. Minimum tillage includes tillage for the establishment of a crop and to control weeds or fertilizing, and can be considered as an intermediate option between no-tillage and conventional tillage. Residue retention is an important goal of no-tillage or reduced tillage

*Las labranzas de conservación describen las prácticas de limitar la labranza general del suelo al mínimo posible para el establecimiento de un cultivo y/o controlar las malezas o fertilizar. Esta práctica se ubica en cierto modo entre la labranza cero y la labranza convencional. La práctica moderna enfatiza la cantidad de retención de residuos como un objetivo importante de la labranza mínima o reducida* *(FAO, 2008)*.

**Crop rotation and association** (*Rotación y asociación de cultivos*)

A **crop rotation** is a succession of different crops in the same field over time. The main objective is to avoid the soil depletion and to discontinue the cycles of both plagues and weeds. Crop a**ssociation** consists in cultivating different crops at the same time on the same land parcel.

*Una* ***rotación*** *es una sucesión de cultivos en una misma parcela a lo largo de tiempo. El objetivo principal es evitar el agotamiento del suelo y romper los ciclos tanto de las plagas como de las malas hierbas.* ***Asociación*** *consiste en cultivar en una misma parcela de tierra varios cultivos.*

**References**

Aguirre-Calderón, O.A. 2015. Manejo forestal en el siglo XXI. Madera y Bosques, 21: 17–28. doi: 10.21829/myb.2015.210423

FAO, 2000. Manejo del suelo en pequeñas fincas. Food and Agriculture Organization of the United Nations (FAO), Roma, Italia.

FAO, 2008. Siembra con labranza cero en la agricultura de conservación. Food and Agriculture Organization of the United Nations (FAO), Roma, Italia.

FAO, 2010. Evaluación de los recursos forestales mundiales 2010: Términos y definiciones. Organization of the United Nations (FAO), Roma, Italia.

Liotta, M., Sagua, D., Gioja, J., Montaño, S. 2015. Manual de capacitación: Drenaje de suelos para uso agrícola. Unidad para el cambio rural, UCAR, Buenos Aires, Argentina.

Mamani, B and Ballivián, J.A. 2008. Rehabilitación y construcción de terrazas agrícolas prehispánicas. Manual técnico. PROMARENA, La Paz, Bolivia.

MINAGRI, 2014. Cartillas para la conservación del suelo: Zanjas de infiltración. Ministerio de Agricultura y riego, Lima, Perú.

Morales, V. 1993. El corral itinerante: una tecnología campesina para el manejo de la fertilidad de los suelos en los Andes. AGRUCO, serie técnica 30, Cochabamba, Bolivia.

Moreno-Pérez, M.F., Roldán-Cañas, J., Chipana Rivera, R. 2016. La práctica de riegos ancestrales Andinos: El riego por Kanis. XXXIV Congreso Nacional de Riegos, Sevilla, España.

Musálem, M. A. 2002. Sistemas agrosilvopastoriles: una alternativa de desarrollo rural sustentable para el trópico mexicano. Revista Chapingo. Serie Ciencias Forestales y del Ambiente 8: 91-100.

TALCA, 2003. Manual de conservación de agua y suelos: Instructivo N° 4 Diques para retención de sedimentos. Sociedad EIAS LTDA, Facultad de Ciencias Forestales, Universidad de Talca, Chile.

Tingo, M. 2014. Delimitación de la faja marginal del margen derecho de la quebrada zoocriadero. Universidad Nacional Agraria de la Selva, Perú.
