# Supplementary material for: The effect of natural infrastructure on water erosion mitigation in the Andes
Source: Copernicus journal article supplement (doi:10.5194/soil-8-133-2022), 2022-02-28
Supplement: Supplementary file 2 [file Supplement B.xlsx]

## Sheet: Peer-reviewed literature
	DATABASE	RESULTS	DATE	SEARCH TERMS	LINKS
BIBLIOGRAPHIC DATABASES	SCOPUS	195	2020-10-01	(“Mass movements” OR “landslides”)	www.scopus.com
				AND (Andes)
				AND ((“forest” OR “deforestation” OR “*forestation”) OR (“grazing” OR “grasslands” OR “pasture”)
				OR(“agriculture” OR “crops” OR “land use”) OR (“puna” OR “paramo” OR “bofedal*”) OR (“dam” OR “reservoir”)
				OR(“soil conservation” OR “management” OR “tillage” OR “terraces”)
				OR(“irrigation” OR “lakes” OR “hydraulic*” OR “ancient knowledge” OR “archaeology”)
				OR(“human” OR “people” OR “land use” OR “anthropogenic”))
	SCOPUS	496	15/1/2020	(“Flood*” or “alluv*")	www.scopus.com
				AND (Andes)
				AND ((“forest” OR “deforestation” OR “*forestation”) OR (“grazing” OR “grasslands” OR “pasture”)
				OR(“agriculture” OR “crops” OR “land use”) OR (“puna” OR “paramo” OR “bofedal*”) OR (“dam” OR “reservoir”)
				OR(“soil conservation” OR “management” OR “tillage” OR “terraces”)
				OR(“irrigation” OR “lakes” OR “hydraulic*” OR “ancient knowledge” OR “archaeology”)
				OR(“human” OR “people” OR “land use” OR “anthropogenic”))
	SCOPUS	707	17/1/2020	(“Rill erosion” or “Runoff” or "soil erosion" or "infiltration" or "water erosion")	www.scopus.com
				AND (Andes)
				AND ((“forest” OR “deforestation” OR “*forestation”) OR (“grazing” OR “grasslands” OR “pasture”)
				OR(“agriculture” OR “crops” OR “land use”) OR (“puna” OR “paramo” OR “bofedal*”) OR (“dam” OR “reservoir”)
				OR(“soil conservation” OR “management” OR “tillage” OR “terraces”)
				OR(“irrigation” OR “lakes” OR “hydraulic*” OR “ancient knowledge” OR “archaeology”)
				OR(“human” OR “people” OR “land use” OR “anthropogenic”))
	SCOPUS	12	24/1/2020	(“Gully” or “Gully erosion” or "sediment yield")	www.scopus.com
				AND (Andes)
				AND ((“forest” OR “deforestation” OR “*forestation”) OR (“grazing” OR “grasslands” OR “pasture”)
				OR(“agriculture” OR “crops” OR “land use”) OR (“puna” OR “paramo” OR “bofedal*”) OR (“dam” OR “reservoir”)
				OR(“soil conservation” OR “management” OR “tillage” OR “terraces”)
				OR(“irrigation” OR “lakes” OR “hydraulic*” OR “ancient knowledge” OR “archaeology”)
				OR(“human” OR “people” OR “land use” OR “anthropogenic”))
	SCOPUS	225	24/1/2020	("sedimentation" and"floodplain" and "sediment" and "deposition")	www.scopus.com
				AND (Andes)
				AND ((“forest” OR “deforestation” OR “*forestation”) OR (“grazing” OR “grasslands” OR “pasture”)
				OR(“agriculture” OR “crops” OR “land use”) OR (“puna” OR “paramo” OR “bofedal*”) OR (“dam” OR “reservoir”)
				OR(“soil conservation” OR “management” OR “tillage” OR “terraces”)
				OR(“irrigation” OR “lakes” OR “hydraulic*” OR “ancient knowledge” OR “archaeology”)
				OR(“human” OR “people” OR “land use” OR “anthropogenic”))

## Sheet: Grey literature
	DATABASE	RESULTS	DATE	SEARCH TERMS	LINKS
Specialist Organizations and ONG	Care Peru	1	2020-01-14	Hand searched project reports.	https://www.care.org.pe/
	Forest Trends	1	2020-01-20	Hand searched project reports.	https://www.forest-trends.org/infraestructura-natural-en-peru/#elproyecto
	The Nature Conservancy (TNC)	3	2020-01-21	Hand searched project reports.	https://www.nature.org/es-us/sobre-tnc/donde-trabajamos/tnc-en-latinoamerica/peru/
					https://cgspace.cgiar.org/handle/10568/35697
	Centre for International Forestry (CIFOR)	3	2020-01-24	(movimiento OR deslizamientos OR flujo OR avalancha OR caida OR inundaciones OR huaico OR lahar OR erosion OR carcavas OR sedimentacion OR aluvion	https://cgspace.cgiar.org/handle/10568/16701
				AND (conservacion de bosque OR manejo de bosque OR proteccion de bosque OR restauracion de bosque OR silvopastorila OR agrosilvopastoril OR forestacion OR reforestaciom OR pastoreo OR pastos OR praderas Or pastizales OR corrales OR puna OR paramo OR bofedal OR humedal OR diques OR surcos OR zanjas de infiltracion OR zanjas de coronacion OR terrazas OR andenes OR faja marginal OR suelos OR mulch O…
Public institutions	Ministerio del Ambiente (MINAM)	2	2020-02-06	Repository: Informes y publicaciones (movimiento OR deslizamientos OR flujo OR avalancha OR caida OR inundaciones OR huaico OR lahar OR erosion OR carcavas OR sedimentacion OR aluvion	https://www.gob.pe/busquedas?contenido[]=publicaciones&institucion[]=minam&reason=sheet&sheet=1
	Ministerio de Agricultura y Riego (MINAGRI)	1	2020-01-14		https://www.gob.pe/busquedas?contenido[]=publicaciones&institucion[]=minagri&reason=sheet&sheet=1
	Consorcio para el Desarrollo Sostenible de la Ecoregión Andina (CONDESAN)	2	2020-01-22	(movimiento OR deslizamientos OR flujo OR avalancha OR caida OR inundaciones OR huaico OR lahar OR erosion OR carcavas OR sedimentacion OR aluvion)	http://infoandina.org/infoandina/publicaciones
	Instituto geofisico del Peru (IGP)	3	2020-02-06	Repository: Informes y publicaciones	https://www.gob.pe/busquedas?contenido[]=publicaciones&institucion[]=igp&reason=sheet&sheet=1
				(movimiento OR deslizamientos OR flujo OR avalancha OR caida OR inundaciones OR huaico OR lahar OR erosion OR carcavas OR sedimentacion OR aluvion)
	Instituto Geologico Minero y Metalurgico (INGEMMET)	50	2020-02-19	Repository: All the collections	https://repositorio.ingemmet.gob.pe/
				(movimiento OR deslizamientos OR flujo OR avalancha OR caida OR inundaciones OR huaico OR lahar OR erosion OR carcavas OR sedimentacion OR aluvion)
	Autoridad Nacional del Agua (ANA)	8	2020-02-17	Repository: Informes y publicaciones	https://www.gob.pe/busquedas?contenido[]=publicaciones&institucion[]=ana&reason=sheet&sheet=1
				(movimiento OR deslizamientos OR flujo OR avalancha OR caida OR inundaciones OR huaico OR lahar OR erosion OR carcavas OR sedimentacion OR aluvion)
	Servicio Nacional de Meteorologia e Hidrologia (Senmahi)	-- Restricted	2020-02-17		https://www.gob.pe/busquedas?contenido[]=publicaciones&institucion[]=senamhi&reason=sheet&sheet=1
	Instituto Nacional de Innovacion Agraria (INIA)	4	2020-02-17	Repository: All the collections	http://repositorio.inia.gob.pe/
				(movimiento OR deslizamientos OR flujo OR avalancha OR caida OR inundaciones OR huaico OR lahar OR erosion OR carcavas OR sedimentacion OR aluvion
				AND (conservacion de bosque OR manejo de bosque OR proteccion de bosque OR restauracion de bosque OR silvopastorila OR agrosilvopastoril OR forestacion OR reforestaciom OR pastoreo OR pastos OR praderas Or pastizales OR corrales OR puna OR paramo OR bofedal OR humedal OR diques OR surcos OR zanjas de infiltracion OR zanjas de coronacion OR terrazas OR andenes OR faja marginal OR suelos OR mulch O…
	Centro Internacional para la Investigación del Fenómeno de El Niño (CIIFEN)	0	2020-02-17	(movimiento OR deslizamientos OR flujo OR avalancha OR caida OR inundaciones OR huaico OR lahar OR erosion OR carcavas OR sedimentacion OR aluvion	http://www.ciifen.org/index.php?option=com_content&view=article&id=1885&Itemid=513&lang=es
Thesis repository - Private and Public Universities	Pontificia Universidad Catolica del Perú	5	2020-02-24	Repository: Licenciatura (Facultad de Ciencias e Ingenieria, Facultad de Ciencias Sociales, Facultad de Estudios Interdiciplinarios, Facultad de Letras y Ciencias Humanas)	http://tesis.pucp.edu.pe/repositorio/
				Repository: Maestria
				Repository: Doctorado
				(movimiento OR deslizamientos OR flujo OR avalancha OR caida OR inundaciones OR huaico OR lahar OR erosion OR carcavas OR sedimentacion OR aluvion
				AND (conservacion de bosque OR manejo de bosque OR proteccion de bosque OR restauracion de bosque OR silvopastorila OR agrosilvopastoril OR forestacion OR reforestaciom OR pastoreo OR pastos OR praderas Or pastizales OR corrales OR puna OR paramo OR bofedal OR humedal OR diques OR surcos OR zanjas de infiltracion OR zanjas de coronacion OR terrazas OR andenes OR faja marginal OR suelos OR mulch O…
	Universidad Peruana Cayetano Heredia	0	2020-02-29	Repository: All the collections	http://repositorio.upch.edu.pe/handle/123456789/16
	Universidad Nacional Mayor de San Marcos	2	2020-02-25	Repository: Ciencias basicas, Humanidades y Ciencias Jurídicas y Sociales, Ingenieria	http://cybertesis.unmsm.edu.pe/
				(movimiento OR deslizamientos OR flujo OR avalancha OR caida OR inundaciones OR huaico OR lahar OR erosion OR carcavas OR sedimentacion OR aluvion
				AND (conservacion de bosque OR manejo de bosque OR proteccion de bosque OR restauracion de bosque OR silvopastorila OR agrosilvopastoril OR forestacion OR reforestaciom OR pastoreo OR pastos OR praderas Or pastizales OR corrales OR puna OR paramo OR bofedal OR humedal OR diques OR surcos OR zanjas de infiltracion OR zanjas de coronacion OR terrazas OR andenes OR faja marginal OR suelos OR mulch O…
	Universidad Nacional Agraria La Molina	9	2020-02-26	Repository: All the collections	http://repositorio.lamolina.edu.pe/
				(movimiento OR deslizamientos OR flujo OR avalancha OR caida OR inundaciones OR huaico OR lahar OR erosion OR carcavas OR sedimentacion OR aluvion
				AND (conservacion de bosque OR manejo de bosque OR proteccion de bosque OR restauracion de bosque OR silvopastorila OR agrosilvopastoril OR forestacion OR reforestaciom OR pastoreo OR pastos OR praderas Or pastizales OR corrales OR puna OR paramo OR bofedal OR humedal OR diques OR surcos OR zanjas de infiltracion OR zanjas de coronacion OR terrazas OR andenes OR faja marginal OR suelos OR mulch O…
	Universidad Nacional de Ingeniería	-- Restricted	2020-02-25		http://cybertesis.uni.edu.pe/
	Universidad Nacional San Antonio Abad del Cusco	0	2020-02-29	Repository: All the collections (movimiento OR deslizamientos OR flujo OR avalancha OR caida OR inundaciones OR huaico OR lahar OR erosion OR carcavas OR sedimentacion OR aluvion) AND (conservacion de bosque OR manejo de bosque OR proteccion de bosque OR restauracion de bosque OR silvopastorila OR agrosilvopastoril OR forestacion OR reforestaciom OR pastoreo OR pastos OR praderas Or pastizales OR…	http://repositorio.unsaac.edu.pe/
	Universidad Nacional del Altiplano	1	2020-02-29		http://repositorio.unap.edu.pe/
	Universidad Nacional de San Agustín de Arequipa	0	2020-02-29		http://bibliotecas.unsa.edu.pe/
	Universidad Nacional Federico Villarreal	0	2020-02-29		http://repositorio.unfv.edu.pe/handle/UNFV/1399
	Universidad Nacional de Piura	0	2020-02-29		http://repositorio.unp.edu.pe/
	Universidad de Piura	0	2020-02-29		https://pirhua.udep.edu.pe/
	Universidad de Ingeniería y Tecnología	0	2020-02-29		https://repositorio.utec.edu.pe/
	Universidad Nacional San Cristóbal de Huamanga	0	2020-02-29		http://repositorio.unsch.edu.pe/
	Universidad Nacional de Cajamarca	0	2020-02-29		http://repositorio.unc.edu.pe/
	Universidad Nacional Pedro Ruiz Gallo	-- Restricted	2020-02-29		http://repositorio.unprg.edu.pe/
	Pontificia Universidad Católica de Chile	0	2020-02-27	Repository: Ciencias Sociales, Ingenieria, Historia y Geografia	https://repositorio.uc.cl/
				(movimiento OR deslizamientos OR flujo OR avalancha OR caida OR inundaciones OR huaico OR lahar OR erosion OR carcavas OR sedimentacion OR aluvion
				AND (conservacion de bosque OR manejo de bosque OR proteccion de bosque OR restauracion de bosque OR silvopastorila OR agrosilvopastoril OR forestacion OR reforestaciom OR pastoreo OR pastos OR praderas Or pastizales OR corrales OR puna OR paramo OR bofedal OR humedal OR diques OR surcos OR zanjas de infiltracion OR zanjas de coronacion OR terrazas OR andenes OR faja marginal OR suelos OR mulch O…
	Universidad de Chile	4	2020-02-27	Repository: Ciencias Agronomicas, Ciencias Forestales, Ciencias Sociales, Ciencias Quimicas y Farmaceuticas	http://repositorio.uchile.cl/
				(movimiento OR deslizamientos OR flujo OR avalancha OR caida OR inundaciones OR huaico OR lahar OR erosion OR carcavas OR sedimentacion OR aluvion
				AND (conservacion de bosque OR manejo de bosque OR proteccion de bosque OR restauracion de bosque OR silvopastorila OR agrosilvopastoril OR forestacion OR reforestaciom OR pastoreo OR pastos OR praderas Or pastizales OR corrales OR puna OR paramo OR bofedal OR humedal OR diques OR surcos OR zanjas de infiltracion OR zanjas de coronacion OR terrazas OR andenes OR faja marginal OR suelos OR mulch O…
	Universidad de los Andes	1	2020-02-27	Repository: All the collections	https://repositorio.uniandes.edu.co/handle/1992/29
				(movimiento OR deslizamientos OR flujo OR avalancha OR caida OR inundaciones OR huaico OR lahar OR erosion OR carcavas OR sedimentacion OR aluvion
				AND (conservacion de bosque OR manejo de bosque OR proteccion de bosque OR restauracion de bosque OR silvopastorila OR agrosilvopastoril OR forestacion OR reforestaciom OR pastoreo OR pastos OR praderas Or pastizales OR corrales OR puna OR paramo OR bofedal OR humedal OR diques OR surcos OR zanjas de infiltracion OR zanjas de coronacion OR terrazas OR andenes OR faja marginal OR suelos OR mulch O…
	Universidad de Cuenca	2	2020-02-27	Repository: Facultad de Ciencias Agropecuarias, Facultad de Ingenieria, Facultad de Ciencias Quimicas	http://dspace.ucuenca.edu.ec/handle/123456789/33356
				(movimiento OR deslizamientos OR flujo OR avalancha OR caida OR inundaciones OR huaico OR lahar OR erosion OR carcavas OR sedimentacion OR aluvion
				AND (conservacion de bosque OR manejo de bosque OR proteccion de bosque OR restauracion de bosque OR silvopastorila OR agrosilvopastoril OR forestacion OR reforestaciom OR pastoreo OR pastos OR praderas Or pastizales OR corrales OR puna OR paramo OR bofedal OR humedal OR diques OR surcos OR zanjas de infiltracion OR zanjas de coronacion OR terrazas OR andenes OR faja marginal OR suelos OR mulch O…
	Universidad de Azuay	-- Restricted	2020-02-27		http://dspace.uazuay.edu.ec/
	Universidad Católica de Cuenca	-- Restricted	2020-02-27		https://dspace.ucacue.edu.ec/
	Universidad Central del Ecuador	-- Restricted	2020-02-27		http://www.dspace.uce.edu.ec/
