# Supplementary material for: The effect of natural infrastructure on water erosion mitigation in the Andes
Source: Copernicus journal article supplement (doi:10.5194/soil-8-133-2022), 2022-02-28
Supplement: Supplementary file 3 [file Supplement C.xlsx]

## Sheet: Supplement C
3.12. Social indicators	0.1.Publication_ID	3.12. Social indicators	1.1.Publication type	1.2.a Reference (1)	1.2.b Reference(2)	1.3.Title	1.4.Journal Title	1.5.a URL(1)	1.5.b URL(2)	3.12. Social indicators	2.1.Country(s) (FAO 2014, ESPA 2014, WB 2014)	2.2. Location (or name of the nearest town or research station)	2.3. Latitude (DD)	2.4. Longitude (DD)	2.5. Altitude (m)	2.6. Bioclimate	2.7. Surface lithology	2.8. Landform	2.9. Ecosystem	3.12. Social indicators	3.1 Experimental design	3.2 Modelling Approach	3.3 Data source	3.4 Spatial scale of study	3.5 Surface area (km²)	3.6 Type of synthesis	3.7 Number of independent studies	3.8 Time of measurement	3.12. Social indicators	4.1 Ecosystem service	4.2 Ecosystem service	4.3 Infraestructura Natural	4.4 Treatment
0. General information	AR001	1. Bibliographic information	peer-reviewed article (original study)	Braud et al. 2001		Vegetation influence on runoff and sediment yield in the Andes region: Observation and modelling	Journal of Hydrology	https://doi.org/10.1016/S0022-1694(01)00500-5		2. Basic information of assessment (ecosystem service, land management practice , indicators)	Argentina	Divisadero largo Mendoza	-33.258	-69.063	1200	Temperate Xeric	Sedimentary (sandstone, siltstone, shales)	Hills	Shrublands	3. Basic information of the study	Control/Ref vs Impact	Process based validation	field monitoring	Small catchment	6	meta-analysis	7	multi-year	4. Ecosystem services and Natural infraestructure	S3	On-site erosion	IN04	NA
	AR003		peer-reviewed article (original study)	Ripley et al. 2010		Land-use impacts on selected soil properties of the Yungas/Chaco transition forest of Jujuy province, northwestern Argentina: a preliminary study	Canadian Journal of Soil Science	https://doi.org/10.4141/cjss09101			Argentina	Yungas/Chaco	-24.483	-65.303	1300	Tropical Pluvial	Sedimentary (sandstone, siltstone, shales)	Mountains	Forests and Woodlands		Gradient Response	No	field monitoring	Landscape	NA	meta-analysis	12	yearly		S3	Off-site erosion	IN02	T1 and T2
	AR004		peer-reviewed article (original study)	La Manna et al. 2018		Soil changes associated with land use in volcanic soils of Patagonia developed on dynamic landscapes	Catena	https://doi.org/10.1016/j.catena.2018.03.025			Argentina	Cuenca del rio Percy	-42.9	-71.37	850	Mediterranean Pluvial/Seasonal Oceanic	Alluvium (Alluvial, Fluvial, and terrace fans deposits, Eolian and Lacustrine, )	Valleys	Herbaceous		Before After Control/Ref and Impact and Paired study	No	field monitoring	Landscape	NA	meta-analysis	2	yearly		S3	Off-site erosion	IN02	T1 and T2
	AR005		peer-reviewed article (original study)	La Manna et al. 2019		137Cs inventories along a climatic gradient in volcanic soils of Patagonia: Potential use for assessing medium term erosion processes	Catena	https://doi.org/10.1016/j.catena.2019.104089			Argentina	Rio Esquel	-42.933	-71.383	1700	Mediterranean Pluvial/Seasonal Oceanic	Alluvium (Alluvial, Fluvial, and terrace fans deposits, Eolian and Lacustrine, )	Valleys	Herbaceous		Gradient Response	No	field monitoring	Landscape	1	meta-analysis	1	multi-year		S3	On-site erosion	IN04, IN03	T1 and T2
	AR007		peer-reviewed article (original study)	La Manna et al. 2016		Soil erodibility and quality of volcanic soils as affected by pine plantations in degraded rangelands of NW Patagonia	European Journal of Forest Research	http://link.springer.com/10.1007/s10342-016-0961-z			Argentina	Rio Esquel Degraded rangelands	-42.933	-71.383	1700	Mediterranean Pluvial/Seasonal Oceanic	Alluvium (Alluvial, Fluvial, and terrace fans deposits, Eolian and Lacustrine, )	Valleys	Herbaceous		Gradient Response	No	field monitoring	Plot scale	75	meta-analysis	1	multi-year		S3	On-site erosion	IN03, IN04	T1 and T2
	BO002		peer-reviewed article (original study)	Vanek and Drinkwater, 2013		Environmental, Social, and Management Drivers of Soil Nutrient Mass Balances in an Extensive Andean Cropping System	Ecosystems	https://doi.org/10.1007/s10021-013-9699-3			Bolivia	Potosi	-17.995	-66.223	3500	Tropical Xeric	Zonal (Igneous, Metamorphic Igneous, Metamorphic Sedimentary)	Mountains	Herbaceous		Control/Ref vs Impact	Mixed NO validation	field monitoring	Plot scale	0.0009	meta-analysis	1	multi-year		S3	On-site erosion	IN14	T1 and T2
	BO003		peer-reviewed article (original study)	Roldan-Cañas et al. 2015		Description and Evaluation of Zigzag Furrow Irrigation in the Inter-Andean Valleys of Bolivia	Journal of Irrigation and Drainage Engineering	https://ascelibrary.org/doi/abs/10.1061/%28ASCE%29IR.1943-4774.0000902			Bolivia	Palca, La Paz	-16.707	-67.837	2800	Tropical Pluvialseasonal	Zonal (Igneous, Metamorphic Igneous, Metamorphic Sedimentary)	Mountains	Herbaceous		Control/Ref vs Impact	No	field monitoring	Plot scale	0	meta-analysis	1	daily		S3	On-site erosion	IN25	T1 and T2
	BO004		peer-reviewed article (original study)	Rodrigues et al. 2016		An insight into pre-Columbian raised fields: The case of San Borja, Bolivian lowlands	Soil	https://doi.org/10.5194/soil-2-367-2016			Bolivia	San Borja	-14.666	-66.652	200	Tropical Pluvialseasonal	Alluvium (Alluvial, Fluvial, and terrace fans deposits, Eolian and Lacustrine, )	Plains	Forests and Woodlands		Control/Ref vs Impact	No	field monitoring	Plot scale	12.3	meta-analysis	10	multi-year		S6	On-site erosion	IN13	T1 and T2
	BO005		peer-reviewed article (original study)	Hartman et al. 2016a		The effects of check dams and other erosion control structures on the restoration of Andean bofedal ecosystems	Restoration Ecology	https://doi.org/10.1111/rec.12402			Bolivia	Tapacarí. Bofedal with 100% extensive grazing	-17.6	-66.8	4300	Tropical Pluvialseasonal	Zonal (Igneous, Metamorphic Igneous, Metamorphic Sedimentary)	Mountains	Herbaceous		Gradient Response	No	field monitoring	Landscape	0.01	meta-analysis	1	multi-year		S4	On-site erosion	IN08, IN07	T1 and T2
	BO006		peer-reviewed article (original study)	Hartman et al. 2016b		Linking changes in knowledge and attitudes with successful land restoration in indigenous communities	Restoration Ecology	https://doi.org/10.1111/rec.12347			Bolivia	Tapacarí. Bofedal with 100% extensive grazing	-17.6	-66.8	4300	Tropical Pluvialseasonal	Zonal (Igneous, Metamorphic Igneous, Metamorphic Sedimentary)	Mountains	Herbaceous		Control/Ref vs Impact	No	field monitoring	Landscape	880	meta-analysis	49	multi-year		S4	On-site erosion	IN08, IN07	T1 and T2
	BO007		peer-reviewed article (original study)	Chipana Rivera et al. 2016		Performance of pre-hispanic irrigation systems in the Andean region of Bolivia	Agricultural Water Management	https://doi.org/10.1016/j.agwat.2015.11.010			Bolivia	Provincia de Ingavi	-16.693	-68.286	3900	Tropical Pluvialseasonal	Zonal (Igneous, Metamorphic Igneous, Metamorphic Sedimentary)	Hills	Herbaceous		Control/Ref vs Impact	No	field monitoring	Plot scale	0.0017	meta-analysis	1	yearly		S6	On-site erosion	IN25	T1: Conservation practices
	BO008		peer-reviewed article (original study)	Coppus et al. 2003		Identification, distribution and characteristics of erosion sensitive areas in three different Central Andean ecosystems	Catena	https://doi.org/10.1016/S0341-8162(02)00169-8			Bolivia	Tarija, Bolivia	-21.857	-64.747	2900	Tropical Pluvialseasonal	Zonal (Igneous, Metamorphic Igneous, Metamorphic Sedimentary)	Mountains	Herbaceous		Gradient Response	No	field monitoring	Landscape	NA	meta-analysis	1	yearly		S3	On-site erosion	IN05	T1: Conservation practices
	BO009		peer-reviewed article (original study)	Jacobi et al. 2015		Agroecosystem resilience and farmers’ perceptions of climate change impacts on cocoa farms in Alto Beni, Bolivia	Renewable Agriculture and Food Systems	https://doi.org/10.1017/S174217051300029X			Bolivia	Alto Beni, Bolivia	-15.63	-67.182	500	Tropical Pluvial	Zonal (Igneous, Metamorphic Igneous, Metamorphic Sedimentary)	Valleys	Shrublands		Control/Ref vs Impact	No	field monitoring	Plot scale	0.03	meta-analysis	12	multi-year		S3	On-site erosion	IN02	T1: Conservation practices
	CH001		Thesis	Mc Innes Jara, 2010		Evauación de la retención y movimiento del agua del suelo en dos microcuencas del sector Alto Loica, Region Metropolitana, Chile		http://repositorio.uchile.cl/handle/2250/151615			Chile	Alto Loica	-33.9934	-71.4839	319	Mediterranean Pluvial/Seasonal Oceanic	Zonal (Igneous, Metamorphic Igneous, Metamorphic Sedimentary)	Hills	Shrublands		Control/Ref vs Impact	Stat model NO validation	field monitoring	Small catchment	0.4	meta-analysis	2	daily		S3	On-site erosion	IN03, IN08, IN09, IN10	T1: Conservation practices
	CH002		Thesis	Kirberg Sermini, 2014		Estabilización de cárcavas con enmiendas orgánicas en la Región de Coquimbo		http://repositorio.uchile.cl/handle/2250/148784			Chile	Comuna de Canela Baja	-31.4475	-71.5652	500	Mediterranean Xeric Oceanic	Zonal (Igneous, Metamorphic Igneous, Metamorphic Sedimentary)	Mountains	Shrublands		Multiple Control/Ref locations or Impact locations	Stat model NO validation	field monitoring	Plot scale	3.6e-05	meta-analysis	9	yearly		S4	On-site erosion	IN14	T1: Conservation practices
	CH004		peer-reviewed article (original study)	Birkinshaw et al. 2011		The effect of forest cover on peak flow and sediment discharge—an integrated field and modelling study in central–southern Chile	Hydrological Processes	https://doi.org/10.1002/hyp.7900			Chile	La reina catchment, Chile	-40.527	-73.466	800	Temperate Hyperoceanic/Temperate Oceanic	Limestone/Calcareous	Hills	Forests and Woodlands		Before After Control/Ref and Impact	Process based NO validation	model-based	Small catchment	0.35	meta-analysis	1	multi-year		S6	On-site erosion	IN03, IN01	T1: Conservation practices
	CH005		peer-reviewed article (original study)	Bathurst and Iroume 2014		Quantitative generalizations for catchment sediment yield following forest logging	Water Resources Research	https://doi.org/10.1002/2014WR015711			Chile	Nacimiento, Chile	-37.522	-72.727	500	Mediterranean Pluvial/Seasonal Oceanic	Zonal (Igneous, Metamorphic Igneous, Metamorphic Sedimentary)	Mountains	Forests and Woodlands		Before After Control/Ref and Impact	No	field monitoring	Small catchment	0.2	meta-analysis	1	multi-year		S5	Off-site erosion	IN01	T1: Conservation practices
	CH006		peer-reviewed article (original study)	Carretier et al. 2018		Review of erosion dynamics along the major N-S climatic gradient in Chile and perspectives	Geomorphology	https://doi.org/10.1016/j.geomorph.2017.10.016			Chile	Cuenca de Biobio, Ricalhue	-37.714	-71.923	400	Temperate Hyperoceanic/Temperate Oceanic	Sedimentary (sandstone, siltstone, shales)	Hills	Shrublands		Gradient Response	No	field monitoring	Landscape	70000	meta-analysis	6	> 100 yrs		S5	On-site erosion	IN03	T1: Conservation practices
	CH007a		Peer-reviewed article (original study)	Tolorza et al., 2014	Pepin et al 2010	Contrasting mountain and piedmont dynamics of sediment discharge associated with groundwater storage variation in the Biobío River	Journal of Geophysical Research F: Earth Surface	https://doi.org/10.1002/2014JF003105	https://doi.org/10.1080/02626667.2010.512868		Chile	BioBio River (Rucalhue)	-37.7106	-71.9017	1350	Mediterranean Pluvial/Seasonal Oceanic	Zonal (Igneous, Metamorphic Igneous, Metamorphic Sedimentary)	Mountains	Forests and Woodlands		Control/Ref vs Impact	Stat model w/o validation	field monitoring	Large catchment	7256	meta-analysis	1	daily		S3	Off-site erosion	IN01	T1: Conservation practices
	CH007b		Peer-reviewed article (original study)	Tolorza et al., 2014	Pepin et al 2010	Contrasting mountain and piedmont dynamics of sediment discharge associated with groundwater storage variation in the Biobío River	Journal of Geophysical Research F: Earth Surface	https://doi.org/10.1002/2014JF003105	https://doi.org/10.1080/02626667.2010.512868		Chile	BioBio River (Tijeral)	-37.731	-72.619	393	Mediterranean Pluvial/Seasonal Oceanic	Zonal (Igneous, Metamorphic Igneous, Metamorphic Sedimentary)	Mountains	Forests and Woodlands		Control/Ref vs Impact	Stat model w/o validation	field monitoring	Large catchment	2476	meta-analysis	1	daily		S3	Extreme events	IN01	T1: Conservation practices
	CH007c		Peer-reviewed article (original study)	Tolorza et al., 2014	Pepin et al 2010	Contrasting mountain and piedmont dynamics of sediment discharge associated with groundwater storage variation in the Biobío River	Journal of Geophysical Research F: Earth Surface	https://doi.org/10.1002/2014JF003105	https://doi.org/10.1080/02626667.2010.512868		Chile	BioBio River (P.Perales)	-37.237	-72.537	1222	Mediterranean Pluvial/Seasonal Oceanic	Zonal (Igneous, Metamorphic Igneous, Metamorphic Sedimentary)	Mountains	Forests and Woodlands		Control/Ref vs Impact	Stat model w/o validation	field monitoring	Large catchment	2590	meta-analysis	1	daily		S3	On-site erosion	IN01	T1: Conservation practices
	CH008		Peer-reviewed article (original study)	Pizarro et al., 2014		Influence of land use and climate on the load of suspended solids in catchments of Andean rivers	Environmental Monitoring and Assessment	https://doi.org/10.1007/s10661-013-3420-z			Chile	Southern Chile	-36.833	-72.5	103	Mediterranean Pluvial/Seasonal Oceanic	Zonal (Igneous, Metamorphic Igneous, Metamorphic Sedimentary)	Mountains	Forests and Woodlands		Control/Ref vs Impact	Stat model w/o validation	field monitoring	Landscape	4400	meta-analysis	19	daily		S3	On-site erosion	IN01, IN03	T1: Conservation practices
	CO001		peer-reviewed article (original study)	Calle et al. 2013		A comparison of vegetation and ground-dwelling ants in abandoned and restored gullies and landslide surfaces in the Western Colombian Andes	Restoration Ecology	https://doi.org/10.1111/rec.12001			Colombia	Valle del Cauca Colombia	3.311	-76.563	1500	Tropical Pluvialseasonal	Alluvium (Alluvial, Fluvial, and terrace fans deposits, Eolian and Lacustrine, )	Hills	Shrublands		Before After Control/Ref and Impact and Paired study	No	field monitoring	Small catchment	0.01	meta-analysis	10	multi-year		S4	On-site erosion	IN12	T1: Conservation practices
	CO002		peer-reviewed article (original study)	Guzman et al. 2019		Variability of soil surface characteristics in a mountainous watershed in Valle del Cauca, Colombia: Implications for runoff, erosion, and conservation	Journal of Hydrology	https://doi.org/10.1016/j.jhydrol.2019.06.002			Colombia	Rio Bolo	3.504	-76.191	1500	Tropical Pluvialseasonal	Sedimentary (sandstone, siltstone, shales)	Mountains	Forests and Woodlands		Gradient Response	No	field monitoring	Landscape	0.75	meta-analysis	1	monthly		S5	On-site erosion	IN06	T1: Conservation practices
	CO003		peer-reviewed article (original study)	Leihner et al. 1996		Soil Conservation Effectiveness and Crop Productivity of Forage Legume Intercropping, Contour Grass Barriers and Contour Ridging in Cassava on Andean Hillsides	Experimental Agriculture	https://doi.org/10.1017/S0014479700026260			Colombia	Santander de Quilichao	3.099	-76.516	1000	Tropical Pluvialseasonal	Alluvium (Alluvial, Fluvial, and terrace fans deposits, Eolian and Lacustrine, )	Plains	Shrublands		Control/Ref vs Impact	Process based NO validation	field monitoring	Plot scale	0.001	meta-analysis	1	multi-year		S3	On-site erosion	IN12	T1: Conservation practices
	CO004		peer-reviewed article (original study)	Restrepo and Kjerfve 2000		Magdalena river: interannual variability (1975–1995) and revised water discharge and sediment load estimates	Journal of Hydrology	https://doi.org/10.1016/S0022-1694(00)00269-9			Colombia	Cuenca de Magdalena	10.274	-74.915	400	Tropical Xeric	Alluvium (Alluvial, Fluvial, and terrace fans deposits, Eolian and Lacustrine, )	Floodplains	Herbaceous		Gradient Response	No	field monitoring	Large catchment	257000	meta-analysis	1	multi-year		S5	On-site erosion	IN03	T1: Conservation practices
	CO005		peer-reviewed article (original study)	Otero et al. 2011		Loss of soil and nutrients by surface runoff in two agro-ecosystems within an Andean paramo area	Ecological Engineering	https://doi.org/10.1016/j.ecoleng.2011.08.001			Colombia	Purace, Cauca	2.363	-76.407	3260	Tropical Pluvialseasonal	Zonal (Igneous, Metamorphic Igneous, Metamorphic Sedimentary)	Mountains	Herbaceous		Control/Ref vs Impact	No	field monitoring	Plot scale	2e-05	meta-analysis	4	monthly		S3	On-site erosion	IN02	T1: Conservation practices
	CO006		peer-reviewed article (original study)	Suescún et al. 2017		Vegetation cover and rainfall seasonality impact nutrient loss via runoff and erosion in the Colombian Andes	Regional Environmental Change	https://doi.org/10.1007/s10113-016-1071-7			Colombia	Cuenca alta rio Grande	6.808	-75.5	2800	Tropical Pluvialseasonal	Zonal (Igneous, Metamorphic Igneous, Metamorphic Sedimentary)	Valleys	Herbaceous		Gradient Response	No	field monitoring	Plot scale	0.0002	meta-analysis	4	yearly		S3	On-site erosion	IN02	T1: Conservation practices
	CO007		peer-reviewed article (original study)	Villa et al. 2019		Carbon sequestration and methane emissions along a microtopographic gradient in a tropical Andean peatland	Science of the Total Environment	https://doi.org/10.1016/j.scitotenv.2018.11.109			Colombia	El Morro, paramo Belmira	6.681	-75.677	3200	Tropical Pluvialseasonal	Zonal (Igneous, Metamorphic Igneous, Metamorphic Sedimentary)	Mountains	Herbaceous		Gradient Response	No	field monitoring	Landscape	0.4	meta-analysis	2	yearly		S3	On-site erosion	IN07	T1: Conservation practices
	EC001		Thesis	Seminario-Berrezueta and Pesantez Pacheco, 2010		Identificación de zonas degradadas y en proceso de erosión		http://dspace.ucuenca.edu.ec/handle/123456789/3027			Ecuador	Quebrada Cachihuayco	-2.80387	-78.9075	2630	Tropical Pluvialseasonal	Sedimentary (sandstone, siltstone, shales)	Mountains	Shrublands		Multiple Control/Ref locations or Impact locatiosn	Stat model w/o validation	field monitoring	Plot scale	9.36e-06	meta-analysis	6	monthly		S3	On-site erosion	IN08, IN09	T1: Conservation practices
	EC003		peer-reviewed article (original study)	Vanacker et al. 2007a		Spatial variation of suspended sediment concentrations in a tropical Andean river system: The Paute River, southern Ecuador	Geomorphology	https://doi.org/10.1016/j.geomorph.2006.06.042			Ecuador	Cuenca media del Paute	-2.775	-78.767	2180	Tropical Pluvialseasonal	Sedimentary (sandstone, siltstone, shales)	Mountains	Shrublands		Gradient Response	No	field monitoring	Large catchment	4930	meta-analysis	29	monthly		S5	Off-site erosion	IN01, IN03	T1: Conservation practices
	EC004		peer-reviewed article (original study)	Dercon et al. 2007		Animal-powered tillage erosion assessment in the southern Andes region of Ecuador	Geomorphology	https://doi.org/10.1016/j.geomorph.2006.06.045			Ecuador	Gima	-3.213	-78.926	3000	Tropical Pluvialseasonal	Zonal (Igneous, Metamorphic Igneous, Metamorphic Sedimentary)	Mountains	Herbaceous		Control/Ref vs Impact	Stat model validation	field monitoring	Plot scale	0.02	meta-analysis	1	yearly		S3	Off-site erosion	IN15, IN11	T1: Conservation practices
	EC005		peer-reviewed article (original study)	Molina et al. 2007		Runoff generation in a degraded Andean ecosystem: Interaction of vegetation cover and land use	Catena	https://doi.org/10.1016/j.catena.2007.04.002			Ecuador	Jadan	-2.894	-78.865	2700	Tropical Pluvialseasonal	Zonal (Igneous, Metamorphic Igneous, Metamorphic Sedimentary)	Mountains	Shrublands		Gradient Response	No	field monitoring	Plot scale	6e-05	meta-analysis	55	hourly		S3	On-site erosion	IN14	T1: Conservation practices
	EC006		peer-reviewed article (original study)	Molina et al. 2008		Environmental factors controlling spatial variation in sediment yield in a central Andean mountain area	Geomorphology	https://doi.org/10.1016/j.geomorph.2006.12.025			Ecuador	Cuenca media del Paute	-2.853	-78.848	2700	Tropical Pluvialseasonal	Sedimentary (sandstone, siltstone, shales)	Mountains	Shrublands		Gradient Response	No	field monitoring	Small catchment	97.55	meta-analysis	37	yearly		S4	On-site erosion	IN03, IN04	T1: Conservation practices
	EC007		peer-reviewed article (original study)	Molina et al. 2009a		Assessing the reduction of the hydrological connectivity of gully systems through vegetation restoration: Field experiments and numerical modelling	Hydrology and Earth System Sciences	https://doi.org/10.5194/hess-13-1823-2009, 2009			Ecuador	Cuenca del Jadan	-3.041	-78.941	2800	Tropical Pluvialseasonal	Sedimentary (sandstone, siltstone, shales)	Mountains	Shrublands		Gradient Response	Process based validation	field monitoring	Small catchment	0.005	meta-analysis	1	hourly		S4	On-site erosion	IN12, IN04	T1: Conservation practices
	EC008		peer-reviewed article (original study)	Molina et al. 2009b		Vegetation and topographic controls on sediment deposition and storage on gully beds in a degraded mountain area	Earth Surface Processes and Landforms	https://doi.org/10.1002/esp.1747			Ecuador	Cuenca media del Paute	-2.902	-78.866	2700	Tropical Pluvialseasonal	Zonal (Igneous, Metamorphic Igneous, Metamorphic Sedimentary)	Mountains	Shrublands		Gradient Response	No	field monitoring	Small catchment	0.01	meta-analysis	1	yearly		S4	On-site erosion	IN12, IN04	T1: Conservation practices
	EC009		peer-reviewed article (original study)	Bathurst et al. 2010		Forests and floods in Latin America: Science, management, policy and the EPIC FORCE project	Water International	https://doi.org/10.1080/02508061003660714			Ecuador	Cuenca del Chanchan	-2.27	-78.893	3000	Tropical Pluvial	Zonal (Igneous, Metamorphic Igneous, Metamorphic Sedimentary)	Mountains	Forests and Woodlands		Before After Control/Ref and Impact and Paired study	Process based validation	field monitoring	Large catchment	12	meta-analysis	1	> 100 yrs		S2	Off-site erosion	IN01	T1: Conservation practices
	EC010		peer-reviewed article (original study)	Molina et al. 2012		Complex land cover change, water and sediment yield in a degraded andean environment	Journal of Hydrology	https://doi.org/10.1016/j.jhydrol.2012.09.012			Ecuador	Cuenca del Jadan	-2.878	-78.88	2300	Tropical Pluvialseasonal	Sedimentary (sandstone, siltstone, shales)	Mountains	Shrublands		Multiple Control/Ref locations or Impact locatiosn	No	field monitoring	Small catchment	296	meta-analysis	1	multi-year		S3	Off-site erosion	IN08	T1: Conservation practices
	EC014		peer-reviewed article (original study)	Knoke et al. 2014		Afforestation or intense pasturing improve the ecological and economic value of abandoned tropical farmlands	Nature Communications	https://doi.org/10.1038/ncomms6612			Ecuador	Sur del Ecuador	-3.976	-79.076	2000	Tropical Pluvialseasonal	Sedimentary (sandstone, siltstone, shales)	Mountains	Forests and Woodlands		Control/Ref vs Impact	No	field monitoring	Plot scale	1.5	meta-analysis	5	multi-year		S3	On-site erosion	IN02	T1: Conservation practices
	EC015		peer-reviewed article (original study)	Gallagher et al. 2017		Yield and nutrient removal in potato-based conservation agriculture cropping systems in the high altitude andean region of Ecuador	Agronomy Journal	https://doi.org/10.2134/agronj2016.11.0635			Ecuador	Cuenca de Illangama	-1.529	-78.952	3500	Tropical Pluvial	Zonal (Igneous, Metamorphic Igneous, Metamorphic Sedimentary)	Mountains	Herbaceous		Control/Ref vs Impact	No	field monitoring	Plot scale	0.001	meta-analysis	1	multi-year		S3	On-site erosion	IN10	T1: Conservation practices
	EC016		peer-reviewed article (original study)	Borja et al. 2018	Borja 2016	Check dams and afforestation reducing sediment mobilization in active gully systems in the Andean mountains	Catena	https://doi.org/10.1016/j.catena.2018.01.013	http://hdl.handle.net/2078.1/182849		Ecuador	Pichacay	-2.967	-78.959	2400	Tropical Pluvial	Sedimentary (sandstone, siltstone, shales)	Mountains	Shrublands		Before After Control/Ref and Impact	No	field monitoring	Small catchment	0.08	meta-analysis	5	multi-year		S4	On-site erosion	IN08, IN03	T1: Conservation practices
	EC017		peer-reviewed article (original study)	Kraemer et al. 2019		Adding another dimension: Temporal development of the spatial distribution of soil and crop properties in slow-forming terrace systems	Agriculture, Ecosystems and Environment	https://doi.org/10.1016/j.agee.2019.05.002			Ecuador	Gima	-3.213	-78.926	3000	Tropical Pluvialseasonal	Zonal (Igneous, Metamorphic Igneous, Metamorphic Sedimentary)	Mountains	Herbaceous		Control/Ref vs Impact	No	field monitoring	Plot scale	0.0004	meta-analysis	1	yearly		S3	On-site erosion	IN15, IN11	T1: Conservation practices
	EC018		peer-reviewed article (original study)	Vanacker et al. 2003b		The effect of short-term socio-economic and demographic change on landuse dynamics and its corresponding geomorphic response with relation to water erosion in a tropical mountainous catchment, Ecuador	Landscape Ecology	https://doi.org/10.1023/A:1022902914221			Ecuador	Cuenca del Machangara	-2.787	-79.016	2900	Tropical Pluvialseasonal	Zonal (Igneous, Metamorphic Igneous, Metamorphic Sedimentary)	Mountains	Shrublands		Gradient Response	No	field monitoring	Small catchment	330	meta-analysis	3	multi-year		S4	On-site erosion	IN03, IN04	T1: Conservation practices
	EC021		peer-reviewed article (original study)	White and Maldonado 1991		The Use and Conservation of Natural Resources in the Andes of Southern Ecuador	Mountain Research and Development	https://doi.org/10.2307/3673526			Ecuador	Cuenca del Paute	-2.895	-78.865	2700	Tropical Pluvialseasonal	Zonal (Igneous, Metamorphic Igneous, Metamorphic Sedimentary)	Mountains	Shrublands		Control/Ref vs Impact	No	field monitoring	Large catchment	5150	meta-analysis	3	multi-year		S3	On-site erosion	IN02	T1: Conservation practices
	EC022a		peer-reviewed article (original study)	Harden 1993		Land use, soil erosion, and reservoir sedimentation in an Andean drainage basin in Ecuador	Mountain Research & Development	https://doi.org/10.2307/3673635			Ecuador	Middle Paute basin	-2.93	-79.221	3500	Tropical Pluvialseasonal	Zonal (Igneous, Metamorphic Igneous, Metamorphic Sedimentary)	Mountains	Herbaceous		After Impact	No	USLE	Large catchment	5000	meta-analysis	5	multi-year		S3	On-site erosion	IN14	T1: Conservation practices
	EC022b		peer-reviewed article (original study)	Harden 1993		Land use, soil erosion, and reservoir sedimentation in an Andean drainage basin in Ecuador	Mountain Research & Development	https://doi.org/10.2307/3673635			Ecuador	Cuenca del Mazar	-2.578	-78.659	3200	Tropical Pluvialseasonal	Sedimentary (sandstone, siltstone, shales)	Mountains	Herbaceous		Control/Ref vs Impact	No	field monitoring	Large catchment	NA	meta-analysis	NA	multi-year		S3	On-site erosion	IN14	T1: Conservation practices
	EC023		peer-reviewed article (original study)	Perrin et al. 2001		Rainfall/runoff processes in a small peri-urban catchment in the Andes Mountains. The Rumihurcu Quebrada, Quito (Ecuador)	Hydrological Processes	https://doi.org/10.1002/hyp.190			Ecuador	Rumihurcu Ruco Pichincha	-0.16	-78.555	3400	Tropical Pluvialseasonal	Zonal (Igneous, Metamorphic Igneous, Metamorphic Sedimentary)	Mountains	Herbaceous		Control/Ref vs Impact	Stat model validation	field monitoring	Small catchment	11.2	meta-analysis	40	multi-year		S3	On-site erosion	IN06	T1: Conservation practices
	EC025		peer-reviewed article (original study)	Harden 2001		Soil Erosion and Sustainable Mountain Development	Mountain Research and Development	https://doi.org/10.1659/0276-4741(2001)021[0077:seasmd]2.0.co;2			Ecuador	Cuenca de Gualaceo	-2.904	-78.751	2700	Tropical Pluvialseasonal	Sedimentary (sandstone, siltstone, shales)	Mountains	Shrublands		Control/Ref vs Impact	No	field monitoring	Plot scale	0.02	meta-analysis	1	multi-year		S3	Off-site erosion	IN14	T1: Conservation practices
	EC026a		peer-reviewed article (original study)	Podwojewski et al. 2002		Overgrazing effects on vegetation cover and properties of volcanic ash soil in the páramo of Llangahua and La Esperanza (Tungurahua, Ecuador)	Soil Use and Management	https://doi.org/10.1111/j.1475-2743.2002.tb00049.x			Ecuador	Cuenca alta del rio Ambato, Chimborazo area "wet paramo"	-1.5	-78.916	3900	Tropical Pluvialseasonal	Zonal (Igneous, Metamorphic Igneous, Metamorphic Sedimentary)	Mountains	Herbaceous		Gradient Response	No	field monitoring	Landscape	0.0001	meta-analysis	2	multi-year		S4	Off-site erosion	IN06, IN04	T1: Conservation practices
	EC026b		peer-reviewed article (original study)	Podwojewski et al. 2002		Overgrazing effects on vegetation cover and properties of volcanic ash soil in the páramo of Llangahua and La Esperanza (Tungurahua, Ecuador)	Soil Use and Management	https://doi.org/10.1111/j.1475-2743.2002.tb00049.x			Ecuador	Cuenca alta del rio Ambato, Chimborazo area "dry paramo"	-1.5	-78.916	3900	Tropical Pluvialseasonal	Zonal (Igneous, Metamorphic Igneous, Metamorphic Sedimentary)	Mountains	Herbaceous		Gradient Response	No	field monitoring	Landscape	0.0001	meta-analysis	2	multi-year		S4	Off-site erosion	IN06, IN04	T1: Conservation practices
	EC027		peer-reviewed article (original study)	Burneo and Gunkel 2003		Ecology of a high Andean stream, Rio Itambi, Otavalo, Ecuador	Limnologica	https://doi.org/10.1016/S0075-9511(03)80005-1			Ecuador	Rio Itambi, Otavalo	0.18	-78.187	3600	Tropical Pluvial	Zonal (Igneous, Metamorphic Igneous, Metamorphic Sedimentary)	Mountains	Herbaceous		Gradient Response	No	field monitoring	Small catchment	112	meta-analysis	1	multi-year		S3	On-site erosion	IN02, IN06	T1: Conservation practices
	EC028		peer-reviewed article (original study)	Vanacker et al. 2003c		The impact of environmental change on the intensity and spatial pattern of water erosion in a semi-arid mountainous Andean environment	Catena	https://doi.org/10.1016/S0341-8162(02)00172-8			Ecuador	Santa Isabel	-3.333	-79.416	1400	Tropical Xeric	Sedimentary (sandstone, siltstone, shales)	Mountains	Shrublands		Gradient Response	Stat model validation	field monitoring	Small catchment	9	meta-analysis	1	multi-year		S4	On-site erosion	IN04, IN01	T1: Conservation practices
	EC029		peer-reviewed article (original study)	Mainville et al. 2006		Decrease of soil fertility and release of mercury following deforestation in the Andean Amazon, Napo River Valley, Ecuador	Science of the Total Environment	https://doi.org/10.1016/j.scitotenv.2005.09.064			Ecuador	Ahuano, Rio Napo	-1.063	-77.549	400	Tropical Pluvialseasonal	Alluvium (Alluvial, Fluvial, and terrace fans deposits, Eolian and Lacustrine, )	Hills	Forests and Woodlands		Gradient Response	No	field monitoring	Landscape	NA	meta-analysis	5	yearly		S3	Extreme events	IN01	T1: Conservation practices
	EC030a		peer-reviewed article (original study)	Buytaert et al. 2007		The effects of afforestation and cultivation on water yield in the Andean páramo	Forest Ecology and Management	https://doi.org/10.1016/j.foreco.2007.06.035			Ecuador	Marianza, rio Tomebamba	-2.853	-79.123	3450	Tropical Pluvialseasonal	Zonal (Igneous, Metamorphic Igneous, Metamorphic Sedimentary)	Mountains	Herbaceous		Before After Control/Ref and Impact and Paired study	No	field monitoring	Small catchment	1.47	meta-analysis	1	multi-year		S6	On-site erosion	IN03, IN06	T1: Conservation practices
	EC030b		peer-reviewed article (original study)	Buytaert et al. 2007		The effects of afforestation and cultivation on water yield in the Andean páramo	Forest Ecology and Management	https://doi.org/10.1016/j.foreco.2007.06.035			Ecuador	Cuenca Soroche	-2.703	-78.997	3772	Tropical Pluvialseasonal	Zonal (Igneous, Metamorphic Igneous, Metamorphic Sedimentary)	Mountains	Herbaceous		Before After Control/Ref and Impact and Paired study	No	field monitoring	Small catchment	4.17	meta-analysis	1	multi-year		S6	On-site erosion	IN06	T1: Conservation practices
	EC031a		peer-reviewed article (original study)	Bathurst et al. 2011	Buytaert et al. 2007	Forest impact on floods due to extreme rainfall and snowmelt in four Latin American environments 1: Field data analysis	Journal of Hydrology	http://dx.doi.org/10.1016/j.jhydrol.2010.11.044	doi:10.1016/j.foreco.2007.06.035		Ecuador	Rio Chanchan	-2.259	-78.912	2500	Tropical Pluvial	Zonal (Igneous, Metamorphic Igneous, Metamorphic Sedimentary)	Mountains	Herbaceous		Before After Control/Ref and Impact and Paired study	No	field monitoring	Small catchment	12	meta-analysis	1	multi-year		S6	On-site erosion	IN03	T1: Conservation practices
	EC031b		peer-reviewed article (original study)	Bathurst et al. 2011	Buytaert et al. 2007	Forest impact on floods due to extreme rainfall and snowmelt in four Latin American environments 1: Field data analysis	Journal of Hydrology	doi:10.1016/j.jhydrol.2010.11.044	doi:10.1016/j.foreco.2007.06.035		Ecuador	Marianza - Pinos/pajonal	-2.853	-79.123	3450	Tropical Pluvial	Zonal (Igneous, Metamorphic Igneous, Metamorphic Sedimentary)	Mountains	Herbaceous		Before After Control/Ref and Impact and Paired study	No	field monitoring	Small catchment	2	meta-analysis	1	multi-year		S6	Off-site erosion	IN03	T1: Conservation practices
	EC033		peer-reviewed article (original study)	Caulfield et al. 2020a		Agroecosystem patterns and land management co-develop through environment, management, and land-use interactions	Ecosphere	https://doi.org/10.1002/ecs2.3113			Ecuador	Naubug, Chimborazo	-1.856	-78.654	3300	Tropical Pluvialseasonal	Zonal (Igneous, Metamorphic Igneous, Metamorphic Sedimentary)	Mountains	Herbaceous		Before After Control/Ref and Impact	No	field monitoring	Plot scale	0.001	meta-analysis	1	multi-year		S3	Extreme events	IN12	T1: Conservation practices
	EC034		peer-reviewed article (original study)	Caulfield et al. 2020b		Live barriers and associated organic amendments mitigate land degradation and improve crop productivity in hillside agricultural systems of the Ecuadorian Andes	Land Degradation and Development	https://doi.org/10.1002/ldr.3558			Ecuador	Naubug, Chimborazo	-1.856	-78.654	3300	Tropical Pluvialseasonal	Zonal (Igneous, Metamorphic Igneous, Metamorphic Sedimentary)	Mountains	Herbaceous		Before After Control/Ref and Impact	No	field monitoring	Landscape	8.2	meta-analysis	1	monthly		S3	On-site erosion	IN09	T2: Protective vegetation
	EC035		peer-reviewed article (original study)	Vanacker et al. 2007b		Restoring dense vegetation can slow mountain erosion to near natural benchmark levels	Geology	https://doi.org/10.1130/G23109A.1			Ecuador	Cuenca del Paute	-2.775	-78.767	2180	Tropical Pluvialseasonal	Sedimentary (sandstone, siltstone, shales)	Mountains	Shrublands		Gradient Response	No	field monitoring	Large catchment	4930	meta-analysis	29	multi-year		S5	On-site erosion	IN05	T2: Protective vegetation
	EC036a		Book	De Noni et al. 2001		Terres d'altitude, terres de risque : la lutte contre l'érosion dans les Andes équatoriennes	ISBN 2-7099-1469-7	http://www.documentation.ird.fr/hor/fdi:010025456			Ecuador	Tumbaco/Cangahua	-0.214	-78.388	2600	Tropical Pluvial	Zonal (Igneous, Metamorphic Igneous, Metamorphic Sedimentary)	Valleys	Shrublands		Control/Ref vs Impact	No	field monitoring	Plot scale	0.002	meta-analysis	2	yearly		S3	On-site erosion	IN12	T2: Protective vegetation
	EC036b		Book	De Noni et al. 2001		Terres d'altitude, terres de risque : la lutte contre l'érosion dans les Andes équatoriennes	ISBN 2-7099-1469-7	http://www.documentation.ird.fr/hor/fdi:010025456			Ecuador	Mojanda	0.13	-78.272	3300	Tropical Pluvial	Zonal (Igneous, Metamorphic Igneous, Metamorphic Sedimentary)	Mountains	Herbaceous		Control/Ref vs Impact	No	field monitoring	Plot scale	0.001	meta-analysis	1	yearly		S3	On-site erosion	IN12	T2: Protective vegetation
	EC036c		Book	De Noni et al. 2001		Terres d'altitude, terres de risque : la lutte contre l'érosion dans les Andes équatoriennes	ISBN 2-7099-1469-7	http://www.documentation.ird.fr/hor/fdi:010025456			Ecuador	Riobamba	-1.769	-78.625	3250	Tropical Pluvialseasonal	Zonal (Igneous, Metamorphic Igneous, Metamorphic Sedimentary)	Mountains	Herbaceous		Control/Ref vs Impact	No	field monitoring	Plot scale	0.001	meta-analysis	1	yearly		S3	On-site erosion	IN12	T2: Protective vegetation
	EC036d		Book	De Noni et al. 2001		Terres d'altitude, terres de risque : la lutte contre l'érosion dans les Andes équatoriennes	ISBN 2-7099-1469-7	http://www.documentation.ird.fr/hor/fdi:010025456			Ecuador	Vega Grande	-4.018	-79.334	1500	Tropical Pluvial	Sedimentary (sandstone, siltstone, shales)	Mountains	Shrublands		Control/Ref vs Impact	No	field monitoring	Plot scale	0.001	meta-analysis	1	yearly		S3	On-site erosion	IN12	T2: Protective vegetation
	EC036e		Book	De Noni et al. 2001		Terres d'altitude, terres de risque : la lutte contre l'érosion dans les Andes équatoriennes	ISBN 2-7099-1469-7	http://www.documentation.ird.fr/hor/fdi:010025456			Ecuador	Ventanas	-1.456	-79.451	220	Tropical Pluvialseasonal	Sedimentary (sandstone, siltstone, shales)	Floodplains	Herbaceous		Control/Ref vs Impact	No	field monitoring	Plot scale	0.001	meta-analysis	1	yearly		S3	On-site erosion	IN12	T2: Protective vegetation
	EC037		peer-reviewed article (original study)	Harden, 1996		Mesoscale Estimation of Soil Erosion in the Rio Ambato Drainage, Ecuadorian Sierra	Mountain Research and Development	https://doi.org/10.2307/3673556			Ecuador	Paute cuenca media	-2.746	-78.822	2800	Tropical Pluvialseasonal	Sedimentary (sandstone, siltstone, shales)	Mountains	Herbaceous		Control/Ref vs Impact	No	field monitoring	Plot scale	0.02	meta-analysis	108	yearly		S3	On-site erosion	IN05	T2: Protective vegetation
	EC038		peer-reviewed article (original study)	Harden, 1988		Mesoscale Estimation of Soil Erosion in the Rio Ambato Drainage, Ecuadorian Sierra	Mountain Research and Development	https://doi.org/10.2307/3673556			Ecuador	Cuenca de Ambato	-1.384	-78.588	3200	Tropical Pluvialseasonal	Zonal (Igneous, Metamorphic Igneous, Metamorphic Sedimentary)	Mountains	Herbaceous		Control/Ref vs Impact	No	field monitoring	Plot scale	0.008	meta-analysis	42	yearly		S3	On-site erosion	IN14	T2: Protective vegetation
	EC039a		peer-reviewed article (original study)	Henry et al. 2013		Land use effects on erosion and carbon storage of the Río Chimbo watershed, Ecuador	Plant and Soil	https://doi.org/10.1007/s11104-012-1478-y			Ecuador	Guaranda Alto Guanujo	-2.46667	-79.0833	3592.67	Tropical Pluvial	Zonal (Igneous, Metamorphic Igneous, Metamorphic Sedimentary)	Mountains	Shrublands		Gradient Response	No	field monitoring	Landscape	3e-05	meta-analysis	1	multi-year		S3	On-site erosion	IN16, IN03	T2: Protective vegetation
	EC039b		peer-reviewed article (original study)	Henry et al. 2013		Land use effects on erosion and carbon storage of the Río Chimbo watershed, Ecuador	Plant and Soil	https://doi.org/10.1007/s11104-012-1478-y			Ecuador	Guaranda Guaranda	-2.35	-80	2656.8	Tropical Pluvial	Zonal (Igneous, Metamorphic Igneous, Metamorphic Sedimentary)	Mountains	Shrublands		Gradient Response	No	field monitoring	Landscape	3e-05	meta-analysis	1	multi-year		S3	On-site erosion	IN16, IN03	T2: Protective vegetation
	EC039c		peer-reviewed article (original study)	Henry et al. 2013		Land use effects on erosion and carbon storage of the Río Chimbo watershed, Ecuador	Plant and Soil	https://doi.org/10.1007/s11104-012-1478-y			Ecuador	Guaranda Chillanes	-2.06667	-80.9667	2185.3	Tropical Pluvial	Zonal (Igneous, Metamorphic Igneous, Metamorphic Sedimentary)	Mountains	Shrublands		Gradient Response	No	field monitoring	Landscape	3e-05	meta-analysis	1	multi-year		S3	On-site erosion	IN16, IN03	T2: Protective vegetation
	EC040		report	UMACPA, 1997		Parcelas de escorrentía. Informe de erosión					Ecuador	Cuenca Rio Paute, Central part	-2.83333	-78.8333	2544.14	Tropical Pluvialseasonal	Sedimentary (sandstone, siltstone, shales)	Mountains	Shrublands		Control/Ref vs Impact	No	field monitoring	Landscape	250	meta-analysis	6	multi-year		S3	On-site erosion	IN09, IN10	T2: Protective vegetation
	EC041		peer-reviewed article (original study)	Harden, 2006		Human impacts on headwater fluvial systems in the northern and central Andes	Geomorphology	https://doi.org/10.1016/j.geomorph.2006.06.021			Ecuador	Cajas national park, Llaviuco	-2.867	-79.2	3200	Tropical Pluvialseasonal	Zonal (Igneous, Metamorphic Igneous, Metamorphic Sedimentary)	Mountains	Herbaceous		Control/Ref vs Impact	No	field monitoring	Plot scale	10	meta-analysis	1	multi-year		S3	On-site erosion	IN04	T2: Protective vegetation
	PE001		peer-reviewed article (original study)	Farrington, 1980		The archaeology of irrigation canals, with special reference to Peru	World Archaeology	https://doi.org/10.1080/00438243.1980.9979768			Peru	Valle Cusichaca	-13.21	-72.43	3000	Tropical Pluvialseasonal	Sedimentary (sandstone, siltstone, shales)	Mountains	Shrublands		Before After no Control/Ref	No	field monitoring	Landscape	10	meta-analysis	1	hourly		S6	On-site erosion	IN25	T2: Protective vegetation
	PE002		peer-reviewed article (original study)	Farrington, 1980		The archaeology of irrigation canals, with special reference to Peru	World Archaeology	https://doi.org/10.1080/00438243.1980.9979768			Peru	Valle Moche	-8.022	-78.831	1000	Tropical Desertic/Tropical Hyperdesertic	Zonal (Igneous, Metamorphic Igneous, Metamorphic Sedimentary)	Mountains	Shrublands		Before After no Control/Ref	No	field monitoring	Landscape	10	meta-analysis	1	hourly		S6	On-site erosion	IN25	T2: Protective vegetation
	PE003		peer-reviewed article (original study)	Alegre and Rao, 1996		Soil and water conservation by contour hedging in the humid tropics of Peru	Agriculture, Ecosystems and Environment	https://doi.org/10.1016/0167-8809(95)01012-2			Peru	Yurimaguas	-5.861	-76.153	200	Tropical Pluvialseasonal	Alluvium (Alluvial, Fluvial, and terrace fans deposits, Eolian and Lacustrine, )	Floodplains	Forests and Woodlands		Multiple Control/Ref locations or Impact locatiosn	No	field monitoring	Plot scale	0.01	meta-analysis	1	multi-year		S3	On-site erosion	IN09	T2: Protective vegetation
	PE004a		Book	Loker and Vosti, 1993		Desarrollo Rural en la Amazonia Peruana		https://cgspace.cgiar.org/handle/10568/53962			Peru	Amazonia Peruana - departemento de San Martin	-6.17211	-74.5142	112	Tropical Pluvialseasonal	Alluvium (Alluvial, Fluvial, and terrace fans deposits, Eolian and Lacustrine, )	Floodplains	Woody Wetlands		Control/Ref vs Impact	Stat model w/o validation	field monitoring	Plot scale	NA	meta-analysis	1	yearly		S3	Off-site erosion	IN14	T2: Protective vegetation
	PE004b		Book	Loker and Vosti, 1993		Desarrollo Rural en la Amazonia Peruana		https://cgspace.cgiar.org/handle/10568/53962			Peru	Amazonia Peruana - departemento de San Martin	-6.17211	-74.5142	112	Tropical Pluvialseasonal	Alluvium (Alluvial, Fluvial, and terrace fans deposits, Eolian and Lacustrine, )	Floodplains	Woody Wetlands		Control/Ref vs Impact	Stat model w/o validation	field monitoring	Plot scale	NA	meta-analysis	1	yearly		S3	Off-site erosion	IN09	T2: Protective vegetation
	PE005		peer-reviewed article (original study)	Inbar and Llerena, 2000		Erosion Processes in High Mountain Agricultural Terraces in Peru	Mountain Research and Development	https://doi.org/10.1659/0276-4741(2000)020[0072:EPIHMA]2.0.CO;2			Peru	San Pedro de Casta	-11.75	-76.583	3000	Tropical Xeric	Sedimentary (sandstone, siltstone, shales)	Mountains	Shrublands		Multiple Control/Ref locations or Impact locatiosn	No	field monitoring	Plot scale	0.0012	meta-analysis	1	multi-year		S3	Off-site erosion	IN11	T2: Protective vegetation
	PE007		peer-reviewed article (original study)	Nordt et al. 2004		Late prehistoric soil fertility, irrigation management, and agricultural production in northwest coastal Peru	Geoarchaeology	https://doi.org/10.1002/gea.10102			Peru	Pampa de Chaparri	-6.543	-79.574	200	Tropical Desertic/Tropical Hyperdesertic	Sedimentary (sandstone, siltstone, shales)	Rolling Plains	Shrublands		Control/Ref vs Impact	No	field monitoring	Landscape	15	meta-analysis	31	yearly		S6	Off-site erosion	IN25	T2: Protective vegetation
	PE008		peer-reviewed article (original study)	Posthumus and De Graaff, 2005		Cost-benefit analysis of bench terraces, a case study in Peru	Land Degradation and Development	https://doi.org/10.1002/ldr.637			Peru	Cuenca del Pacucha	-13.597	-73.338	3500	Tropical Pluvialseasonal	Sedimentary (sandstone, siltstone, shales)	Mountains	Herbaceous		Before After Control/Ref and Impact	No	field monitoring	Plot scale	0.011	meta-analysis	2	yearly		S3	Extreme events	IN11	T2: Protective vegetation
	PE009		peer-reviewed article (original study)	Goodman-Elgar, 2008		Evaluating soil resilience in long-term cultivation: a study of pre-Columbian terraces from the Paca Valley, Peru	Journal of Archaeological Science	https://doi.org/10.1016/j.jas.2008.06.003			Peru	Valle del Paca	-11.707	-75.52	3900	Tropical Pluvialseasonal	Sedimentary (sandstone, siltstone, shales)	Mountains	Shrublands		Gradient Response	No	field monitoring	Plot scale	NA	meta-analysis	1	yearly		S3	On-site erosion	IN11	T2: Protective vegetation
	PE010		Report	Quintero et al., 2005		Mecanismos de pago por Servicios Ambientales en la región de Moyobamba. Estudio Piloto: Microcuencas Miskiyacu y Rumiyacu.		https://cgspace.cgiar.org/handle/10568/21929			Peru	Microcuenca Miskiyacu y Rumiyacu	-6.08509	-76.9612	1075	Tropical Pluvialseasonal	Sedimentary (sandstone, siltstone, shales)	Mountains	Forests and Woodlands		Multiple Control/Ref vs Impact	Process based NO validation	model-based	Small catchment	0.23	meta-analysis	1	daily		S3	On-site erosion	IN03, IN09, IN16	T2: Protective vegetation
	PE011		peer-reviewed article (original study)	Posthumus and Stroosnijder, 2010		To terrace or not: The short-term impact of bench terraces on soil properties and crop response in the Peruvian Andes	Environment, Development and Sustainability	https://doi.org/10.1007/s10668-009-9193-4			Peru	Cuenca del Pacucha	-13.618	-73.351	3300	Tropical Pluvialseasonal	Sedimentary (sandstone, siltstone, shales)	Mountains	Herbaceous		Control/Ref vs Impact	No	field monitoring	Plot scale	NA	meta-analysis	1	yearly		S3	On-site erosion	IN11	T2: Protective vegetation
	PE013		Book	Villar Cabeza et al., 2014		Valoración Técnica, Económica Y Ambiental Manejo Eficiente De Los Recursos Forestales Y De Fauna Silvestre		http://repositorio.inia.gob.pe/handle/inia/376			Peru	Cochamarca	-7.27665	-78.2202	2820	Tropical Pluvialseasonal	Sedimentary (sandstone, siltstone, shales)	Mountains	Forests and Woodlands		After Impact	Stat model NO validation	field monitoring	Plot scale	0.04	meta-analysis	3	monthly		S3	On-site erosion	IN02	T2: Protective vegetation
	PE014		Thesis	Carrion Mogoyon, 2018		Evaluación de la intercuenca Alto Huallaga haciendo uso de la hidrología de bosques		http://hdl.handle.net/20.500.12404/14598			Peru	Intercuenca Alto Huallaga	-9.75044	-76.2798	3715	Tropical Pluvial	Zonal (Igneous, Metamorphic Igneous, Metamorphic Sedimentary)	Mountains	Shrublands		Control/Ref vs Impact	Mixed NO validation	USLE	Large catchment	12309.1	meta-analysis	1	multi-year		S3	On-site erosion	IN01	T2: Protective vegetation
	PE016		Thesis	Velasquez Castro, 2019		Análisis de los potenciales problemas de sedimentación y medidas de mitigación en la presa Palo Redondo		http://hdl.handle.net/20.500.12404/14599			Peru	Tablachaca	-8.51806	-78.1651	1958	Tropical Desertic/Tropical Hyperdesertic	Sedimentary (sandstone, siltstone, shales)	Mountains	Shrublands		Multiple Control/Ref locations or Impact locatiosn	Mixed NO validation	USLE	Large catchment	3049	meta-analysis	1	monthly		S3	On-site erosion	IN03, IN14	T2: Protective vegetation
	PE017		peer-reviewed article (original study)	Nanavati et al. 2016		Testing soil fertility of Prehispanic terraces at Viejo Sangayaico in the upper Ica catchment of south-central highland Peru	Catena	http://dx.doi.org/10.1016/j.catena.2016.03.007			Peru	Sangayaico	-13.781	-75.28	3600	Tropical Xeric	Zonal (Igneous, Metamorphic Igneous, Metamorphic Sedimentary)	Mountains	Herbaceous		Control/Ref vs Impact	No	field monitoring	Landscape	0.002	meta-analysis	1	yearly		S3	On-site erosion	IN11	T2: Protective vegetation
	PE019		Thesis	Portocarrero Gallardo, 2018		Efectos del control de erosión en la recuperación de ecosistemas - estudio de caso Laguna Canrash-, Provincia de Huari, Ancash, Perú		http://repositorio.lamolina.edu.pe/handle/UNALM/3551			Peru	Laguna Canrash	-9.69361	-77.0472	4345	Tropical Pluvial	Sedimentary (sandstone, siltstone, shales)	Mountains	Herbaceous		Before After no Control/Ref	Stat model NO validation	field monitoring	Plot scale	NA	meta-analysis	1	daily		S3	Off-site erosion	IN06, IN08	T2: Protective vegetation
	PE020		Thesis	Escobar Soldevilla, 2019		Mitigación de la erosión hídrica para la conservación del suelo en la subcuenca del río Ichu, Huancavelica		http://repositorio.lamolina.edu.pe/handle/UNALM/4156			Peru	Sub cuenca Ichu	-12.7546	-75	4448	Tropical Pluvialseasonal	Sedimentary (sandstone, siltstone, shales)	Mountains	Herbaceous		Control/Ref vs Impact	Mixed NO validation	USLE	Large catchment	1361.65	meta-analysis	1	multi-year		S3	Off-site erosion	IN03, IN06, IN09, IN10, IN11	T2: Protective vegetation
	PE021		Thesis	Quispe Ojeda, 2018		Influencia de la cobertura vegetal en la erosión hídrica del suelo en la comunidad San Mateo, Perú		http://repositorio.lamolina.edu.pe/handle/UNALM/3600			Peru	San Mateo	-11.7575	-76.3017	3320	Tropical Xeric	Sedimentary (sandstone, siltstone, shales)	Mountains	Shrublands		Multiple Control/Ref vs Impact	Stat model NO validation	field monitoring	Plot scale	0.00012996	meta-analysis	16	monthly		S3	Extreme events	IN03, IN14	T2: Protective vegetation
	PE022		Thesis	Oscano Gamarra, 2016		Influencia de las prácticas de conservación de suelos y mejora de la función hidrológica de praderas naturales altoandinas		http://repositorio.lamolina.edu.pe/handle/UNALM/2843			Peru	Sub cuenca Urpay	-9.68496	-77.3877	4050	Tropical Pluvialseasonal	Zonal (Igneous, Metamorphic Igneous, Metamorphic Sedimentary)	Mountains	Herbaceous		Multiple Control/Ref vs Impact	Mixed validation	field monitoring	Plot scale	0.001875	meta-analysis	3	monthly		S3	Extreme events	IN09, IN10	T2: Protective vegetation
	PE023		peer-reviewed article (original study)	de Valenca et al. 2017		Land use as a driver of soil fertility and biodiversity across an agricultural landscape in the Central Peruvian Andes	Ecological Applications	https://doi.org/10.1002/eap.1508			Peru	Quilcas-Huancayo	-11.937	-75.259	3800	Tropical Pluvialseasonal	Sedimentary (sandstone, siltstone, shales)	Mountains	Herbaceous		Gradient Response	No	field monitoring	Landscape	NA	meta-analysis	14	yearly		S3	Extreme events	IN01	T2: Protective vegetation
	PE024		Thesis	Zuñiga Huaco, 2017		Determinación de la pérdida de suelos en la cuenca aportante del embalse Aguada Blanca - Arequipa aplicando USLE y técnicas geoespaciales		http://repositorio.lamolina.edu.pe/handle/UNALM/3072			Peru	Cuenca Aguada Blanca	-15.9733	-71.1778	4452	Tropical Pluvialseasonal	Zonal (Igneous, Metamorphic Igneous, Metamorphic Sedimentary)	Hills	Shrublands		Control/Ref vs Impact	Mixed NO validation	USLE	Large catchment	4016	meta-analysis	1	multi-year		S3	Extreme events	IN06	T2: Protective vegetation
	PE025		Thesis	Pastor Jáuregui, 1992		Evaluación de la erosión hídrica en la zona de Chanchamayo- Junín 4 utilizando con 1a cobertura vegetal el cultivo de camote (lpomoea batatas l.)		http://repositorio.lamolina.edu.pe/handle/UNALM/1840			Peru	San Miguel	-11.1565	-75.3598	900	Tropical Pluvial	Alluvium (Alluvial, Fluvial, and terrace fans deposits, Eolian and Lacustrine, )	Mountains	Forests and Woodlands		Multiple Control/Ref vs Impact	Stat model w/o validation	field monitoring	Plot scale	0.0012	meta-analysis	30	daily		S3	On-site erosion	IN09	T2: Protective vegetation
	PE026		Thesis	La Torre Martinez, 1985		Efecto de sistemas de cultivos sobre la escorrentia, erosión y pérdida de nutrientes en un entisol de la selva alta - CAP José Santos Atahualpa - San Ramón - Chanchamayo		http://repositorio.lamolina.edu.pe/handle/UNALM/1813			Peru	San Ramon	-11.1333	-75.3333	831	Tropical Pluvial	Zonal (Igneous, Metamorphic Igneous, Metamorphic Sedimentary)	Mountains	Forests and Woodlands		Multiple Control/Ref vs Impact	Stat model w/o validation	field monitoring	Plot scale	0.00048	meta-analysis	12	daily		S3	On-site erosion	IN14	T2: Protective vegetation
	PE029		peer-reviewed article (original study)	Segnini et al. 2010		Spectroscopic Assessment of Soil Organic Matter in Wetlands from the High Andes	Soil Science Society of America Journal	10.2136/sssaj2009.0445			Peru	Huayllapata, Puno	-14.833	-69.833	4200	Tropical Pluvialseasonal	Alluvium (Alluvial, Fluvial, and terrace fans deposits, Eolian and Lacustrine, )	Hills	Herbaceous		Control/Ref vs Impact	No	field monitoring	Landscape	NA	meta-analysis	1	yearly		S3	On-site erosion	IN07	T2: Protective vegetation
	PE031		peer-reviewed article (original study)	Rolando et al. 2017		Soil organic carbon stocks and fractionation under different land uses in the Peruvian high-Andean Puna	Geoderma	http://dx.doi.org/10.1016/j.geoderma.2017.07.037			Peru	Provincia de Junin	-11	-76	4400	Tropical Pluvial	Sedimentary (sandstone, siltstone, shales)	Mountains	Herbaceous		Before After Control/Ref and Impact	No	field monitoring	Plot scale	1.23	meta-analysis	2	yearly		S3	On-site erosion	IN07	T2: Protective vegetation
	PE032		peer-reviewed article (original study)	Clark et al. 2017		Erosion of organic carbon from the Andes and its effects on ecosystem carbon dioxide balance	Journal of Geophysical Research: Biogeosciences	http://dx.doi.org/10.1002/2016JG003615			Peru	San Pedro	-13.06	-71.544	2800	Tropical Pluvial	Zonal (Igneous, Metamorphic Igneous, Metamorphic Sedimentary)	Mountains	Forests and Woodlands		Gradient Response	No	field monitoring	Small catchment	164.4	meta-analysis	1	yearly		S6	On-site erosion	IN01	T2: Protective vegetation
	PE033		peer-reviewed article (original study)	Clark et al. 2017		Erosion of organic carbon from the Andes and its effects on ecosystem carbon dioxide balance	Journal of Geophysical Research: Biogeosciences	http://dx.doi.org/10.1002/2016JG003615			Peru	Wayqecha	-13.162	-71.589	3195	Tropical Pluvial	Zonal (Igneous, Metamorphic Igneous, Metamorphic Sedimentary)	Mountains	Forests and Woodlands		Gradient Response	No	field monitoring	Small catchment	48.5	meta-analysis	1	yearly		S6	On-site erosion	IN01	T2: Protective vegetation
	PE034		peer-reviewed article (original study)	Goodbred Jr. et al. 2020		Transformation of maritime desert to an agricultural center: Holocene environmental change and landscape engineering in Chicama River valley, northern Peru coast	Quaternary Science Reviews	https://doi.org/10.1016/j.quascirev.2019.106046			Peru	Valle del rio Chicama	-7.714	-79.008	600	Tropical Desertic/Tropical Hyperdesertic	Zonal (Igneous, Metamorphic Igneous, Metamorphic Sedimentary)	Mountains	Shrublands		Gradient Response	No	field monitoring	Landscape	4800	meta-analysis	1	> 100 yrs		S6	Off-site erosion	IN25, IN24	T2: Protective vegetation
	PE035		peer-reviewed article (original study)	Londoño 2008		Pattern and rate of erosion inferred from Inca agricultural terraces in arid southern Peru	Geomorphology	doi:10.1016/j.geomorph.2007.09.014			Peru	Camata, Moquegua valley	-17.056	-70.814	2800	Tropical Desertic/Tropical Hyperdesertic	Zonal (Igneous, Metamorphic Igneous, Metamorphic Sedimentary)	Mountains	Shrublands		Control/Ref vs Impact	No	field monitoring	Plot scale	0	meta-analysis	1	> 100 yrs		S3	On-site erosion	IN11	T2: Protective vegetation
	PE037a		peer-reviewed article (original study)	Vasquez and Tapia 2011		Cuantificación de la erosión hídrica superficial en las laderas semiáridas de la Sierra Peruana	Revista INGENIERÍA UC	https://www.redalyc.org/articulo.oa?id=70723269005			Peru	Ancash	-9.383	-77.327	3762	Tropical Pluvialseasonal	Sedimentary (sandstone, siltstone, shales)	Mountains	Herbaceous		Control/Ref vs Impact	No	field monitoring	Plot scale	0.01	meta-analysis	5	yearly		S3	Extreme events	IN10	T2: Protective vegetation
	PE037b		peer-reviewed article (original study)	Vasquez and Tapia 2011		Cuantificación de la erosión hídrica superficial en las laderas semiáridas de la Sierra Peruana	Revista INGENIERÍA UC	https://www.redalyc.org/articulo.oa?id=70723269005			Peru	Apurimac	-13.63	-72.946	3867	Tropical Pluvialseasonal	Sedimentary (sandstone, siltstone, shales)	Mountains	Herbaceous		Control/Ref vs Impact	No	field monitoring	Plot scale	0.01	meta-analysis	2	yearly		S3	Extreme events	IN10	T2: Protective vegetation
	PE037c		peer-reviewed article (original study)	Vasquez and Tapia 2011		Cuantificación de la erosión hídrica superficial en las laderas semiáridas de la Sierra Peruana	Revista INGENIERÍA UC	https://www.redalyc.org/articulo.oa?id=70723269005			Peru	Arequipa	-15.662	-71.695	3458	Tropical Pluvialseasonal	Zonal (Igneous, Metamorphic Igneous, Metamorphic Sedimentary)	Mountains	Herbaceous		Control/Ref vs Impact	No	field monitoring	Plot scale	0.01	meta-analysis	1	yearly		S3	On-site erosion	IN10	T2: Protective vegetation
	PE037d		peer-reviewed article (original study)	Vasquez and Tapia 2011		Cuantificación de la erosión hídrica superficial en las laderas semiáridas de la Sierra Peruana	Revista INGENIERÍA UC	https://www.redalyc.org/articulo.oa?id=70723269005			Peru	Ayacucho	-12.986	-74.125	4074	Tropical Pluvialseasonal	Sedimentary (sandstone, siltstone, shales)	Mountains	Herbaceous		Control/Ref vs Impact	No	field monitoring	Plot scale	0.01	meta-analysis	1	yearly		S3	On-site erosion	IN10	T2: Protective vegetation
	PE037e		peer-reviewed article (original study)	Vasquez and Tapia 2011		Cuantificación de la erosión hídrica superficial en las laderas semiáridas de la Sierra Peruana	Revista INGENIERÍA UC	https://www.redalyc.org/articulo.oa?id=70723269005			Peru	Cajamarca	-7.042	-78.357	3380	Tropical Pluvialseasonal	Sedimentary (sandstone, siltstone, shales)	Mountains	Herbaceous		Control/Ref vs Impact	No	field monitoring	Plot scale	0.01	meta-analysis	2	yearly		S3	Extreme events	IN10	T2: Protective vegetation
	PE037f		peer-reviewed article (original study)	Vasquez and Tapia 2011		Cuantificación de la erosión hídrica superficial en las laderas semiáridas de la Sierra Peruana	Revista INGENIERÍA UC	https://www.redalyc.org/articulo.oa?id=70723269005			Peru	Cusco	-13.531	-71.79	4084	Tropical Pluvialseasonal	Sedimentary (sandstone, siltstone, shales)	Mountains	Herbaceous		Control/Ref vs Impact	No	field monitoring	Plot scale	0.01	meta-analysis	2	yearly		S3	Extreme events	IN10	T2: Protective vegetation
	PE037g		peer-reviewed article (original study)	Vasquez and Tapia 2011		Cuantificación de la erosión hídrica superficial en las laderas semiáridas de la Sierra Peruana	Revista INGENIERÍA UC	https://www.redalyc.org/articulo.oa?id=70723269005			Peru	Huancavelica	-12.235	-75.079	4085	Tropical Pluvialseasonal	Sedimentary (sandstone, siltstone, shales)	Mountains	Herbaceous		Control/Ref vs Impact	No	field monitoring	Plot scale	0.01	meta-analysis	1	yearly		S3	On-site erosion	IN10	T2: Protective vegetation
	PE037h		peer-reviewed article (original study)	Vasquez and Tapia 2011		Cuantificación de la erosión hídrica superficial en las laderas semiáridas de la Sierra Peruana	Revista INGENIERÍA UC	https://www.redalyc.org/articulo.oa?id=70723269005			Peru	Huanuco	-10.15	-76.419	3375	Tropical Pluvial	Sedimentary (sandstone, siltstone, shales)	Mountains	Herbaceous		Control/Ref vs Impact	No	field monitoring	Plot scale	0.01	meta-analysis	2	yearly		S3	On-site erosion	IN10	T2: Protective vegetation
	PE037i		peer-reviewed article (original study)	Vasquez and Tapia 2011		Cuantificación de la erosión hídrica superficial en las laderas semiáridas de la Sierra Peruana	Revista INGENIERÍA UC	https://www.redalyc.org/articulo.oa?id=70723269005			Peru	Junin	-11.82	-75.437	3813	Tropical Pluvialseasonal	Sedimentary (sandstone, siltstone, shales)	Mountains	Herbaceous		Control/Ref vs Impact	No	field monitoring	Plot scale	0.01	meta-analysis	2	yearly		S3	On-site erosion	IN10	T2: Protective vegetation
	PE037j		peer-reviewed article (original study)	Vasquez and Tapia 2011		Cuantificación de la erosión hídrica superficial en las laderas semiáridas de la Sierra Peruana	Revista INGENIERÍA UC	https://www.redalyc.org/articulo.oa?id=70723269005			Peru	La Libertad	-8.039	-78.26	3395	Tropical Pluvialseasonal	Sedimentary (sandstone, siltstone, shales)	Mountains	Herbaceous		Control/Ref vs Impact	No	field monitoring	Plot scale	0.01	meta-analysis	2	yearly		S3	On-site erosion	IN10	T2: Protective vegetation
	PE037k		peer-reviewed article (original study)	Vasquez and Tapia 2011		Cuantificación de la erosión hídrica superficial en las laderas semiáridas de la Sierra Peruana	Revista INGENIERÍA UC	https://www.redalyc.org/articulo.oa?id=70723269005			Peru	Lima	-10.602	-76.946	3908	Tropical Pluvialseasonal	Sedimentary (sandstone, siltstone, shales)	Mountains	Herbaceous		Control/Ref vs Impact	No	field monitoring	Plot scale	0.01	meta-analysis	1	yearly		S3	On-site erosion	IN10	T2: Protective vegetation
	PE037l		peer-reviewed article (original study)	Vasquez and Tapia,2011		Cuantificación de la erosión hídrica superficial en las laderas semiáridas de la Sierra Peruana	Revista INGENIERÍA UC	https://www.redalyc.org/articulo.oa?id=70723269005			Peru	Moquegua	-16.633	-71.057	2604	Tropical Desertic/Tropical Hyperdesertic	Sedimentary (sandstone, siltstone, shales)	Mountains	Shrublands		Control/Ref vs Impact	No	field monitoring	Plot scale	0.01	meta-analysis	1	yearly		S3	On-site erosion	IN10	T2: Protective vegetation
	VE001		peer-reviewed article (original study)	Sarmiento et al. 2015		Constraints for the restoration of tropical alpine vegetation on degraded slopes of the Venezuelan Andes	Plant Ecology and Diversity	https://doi.org/10.1080/17550874.2014.898163			Venezuela	Chama River	8.896	-70.799	4000	Tropical Pluvialseasonal	Zonal (Igneous, Metamorphic Igneous, Metamorphic Sedimentary)	Mountains	Forests and Woodlands		Multiple Control/Ref locations or Impact locatiosn	No	field monitoring	Landscape	300	meta-analysis	1	multi-year		S3	On-site erosion	IN06	T2: Protective vegetation
	VE002		peer-reviewed article (original study)	Ataroff and Monasterio 1997		Soil erosion under different management of coffee plantations in the Venezuelan Andes	Soil Technology	https://doi.org/10.1016/S0933-3630(96)00118-3			Venezuela	Canagua, Merida	8.133	-71.3	1730	Tropical Pluvial	Sedimentary (sandstone, siltstone, shales)	Mountains	Forests and Woodlands		Control/Ref vs Impact	No	field monitoring	Plot scale	0.0001	meta-analysis	1	multi-year		S3	On-site erosion	IN09	T2: Protective vegetation
	VE003		peer-reviewed article (original study)	Rymshaw et al. 1997		Processes of soil movement on steep cultivated hill slopes in the Venezuelan Andes	Soil and Tillage Research	https://doi.org/10.1016/S0167-1987(97)00055-X			Venezuela	Cuenca del Bocono	9.531	-70.019	1500	Tropical Pluvialseasonal	Sedimentary (sandstone, siltstone, shales)	Mountains	Forests and Woodlands		Control/Ref vs Impact	No	field monitoring	Plot scale	0.02	meta-analysis	1	multi-year		S3	On-site erosion	IN02	T2: Protective vegetation
	VE004		peer-reviewed article (original study)	Sarmiento 2000		Water Balance and Soil Loss Under Long Fallow Agriculture in the Venezuelan Andes	Mountain Research and Development	https://doi.org/10.1659/0276-4741(2000)020[0246:WBASLU]2.0.CO;2			Venezuela	Paramo de Gavidia	8.724	-70.945	3600	Tropical Pluvialseasonal	Zonal (Igneous, Metamorphic Igneous, Metamorphic Sedimentary)	Mountains	Herbaceous		Before After Control/Ref and Impact	No	field monitoring	Plot scale	0.001	meta-analysis	1	multi-year		S3	On-site erosion	IN02	T2: Protective vegetation
	VE005		peer-reviewed article (original study)	Sanchez et al. 2002		Soil erosion under different vegetation covers in the Venezuelan Andes	Environmentalist	https://doi.org/10.1023/A:1015389918416			Venezuela	Rio Grita, Maracaibo	8.138	-72.025	1800	Tropical Pluvialseasonal	Sedimentary (sandstone, siltstone, shales)	Mountains	Forests and Woodlands		Control/Ref vs Impact	No	field monitoring	Plot scale	0.0002	meta-analysis	1	multi-year		S3	On-site erosion	IN02	T2: Protective vegetation
