# Supplementary material for: The effect of natural infrastructure on water erosion mitigation in the Andes
Source: Copernicus journal article supplement (doi:10.5194/soil-8-133-2022), 2022-02-28
Supplement: Supplementary file 4 [file Supplement D.docx]

## Supplement D. Studies included in the systematic review

Alegre, J. C., & Rao, M. R. (1996). Soil and water conservation by contour hedging in the humid tropics of Peru. *Agriculture, Ecosystems and Environment*, *57*(1), 17–25. <https://doi.org/10.1016/0167-8809(95)01012-2>

Argudo, H. (1997). *Umacpa, Informe de erosion en parcelas de escorrentia*. Informe técnico, Cuenca, Ecuador

Ataroff, M., & Monasterio, M. (1997). Soil erosion under different management of coffee plantations in the Venezuelan Andes. *Soil Technology*, *11*(1), 95–108. <https://doi.org/10.1016/S0933-3630(96)00118-3>

Balthazar, V. (2014). Remote sensing of forest cover change and ecosystem dynamics in mountain areas. Ph.D thesis, University of Louvain, Belgium

Bathurst, J. C., Amezaga, J., Cisneros, F., Gaviño Novillo, M., Iroumé, A., Lenzi, M. A., Mintegui Aguirre, J., Miranda, M., & Urciuolo, A. (2010). Forests and floods in Latin America: Science, management, policy and the EPIC FORCE project. *Water International*, *35*(2), 114–131. <https://doi.org/10.1080/02508061003660714>

Bathurst, J. C., & Iroumé, A. (2014). Quantitative generalizations for catchment sediment yield following forest logging. *Water Resources Research*, *50*(11), 8383–8402. <https://doi.org/10.1002/2014WR015711>

Bathurst, J. C., Iroumé, A., Cisneros, F., Fallas, J., Iturraspe, R., Novillo, M. G., Urciuolo, A., Bièvre, B. de, Borges, V. G., Coello, C., Cisneros, P., Gayoso, J., Miranda, M., & Ramírez, M. (2011). Forest impact on floods due to extreme rainfall and snowmelt in four Latin American environments 1: Field data analysis. *Journal of Hydrology*, *400*(3–4), 281–291. <https://doi.org/10.1016/j.jhydrol.2010.11.044>

Birkinshaw, S. J., Bathurst, J. C., Iroumé, A., & Palacios, H. (2011). The effect of forest cover on peak flow and sediment discharge-an integrated field and modelling study in central-southern Chile. *Hydrological Processes*, *25*(8), 1284–1297. <https://doi.org/10.1002/hyp.7900>

Borja, P., Molina, A., Govers, G., & Vanacker, V. (2018). Check dams and afforestation reducing sediment mobilization in active gully systems in the Andean mountains. *Catena*, *165*(January), 42–53. <https://doi.org/10.1016/j.catena.2018.01.013>

Borja, P. (2016). Effectiveness of soil and water conservation treatments on soil and catchment restoration. Ph.D thesis, University of Louvain, Belgium

Braud, I., Vich, A. I. J., Zuluaga, J., Fornero, L., & Pedrani, A. (2001). Vegetation influence on runoff and sediment yield in the Andes region: Observation and modelling. *Journal of Hydrology*, *254*(1–4), 124–144. <https://doi.org/10.1016/S0022-1694(01)00500-5>

Brenning, A., Schwinn, M., Ruiz-Páez, A. P., & Muenchow, J. (2015). Landslide susceptibility near highways is increased by 1 order of magnitude in the Andes of southern Ecuador, Loja province. *Natural Hazards and Earth System Sciences*, *15*(1), 45–57. <https://doi.org/10.5194/nhess-15-45-2015>

Buján, A., Santanatoglia, O. J., Chagas, C., Massobrio, M., Castiglioni, M., Yáñez, M. S., Ciallella, H., & Fernández, J. (2000). Preliminary study on the use of the 137Cs method for soil erosion investigation in the pampean region of Argentina. *Acta Geologica Hispanica*, *35*(3–4), 271–277.

Burneo, P. C., & Gunkel, G. (2003). Ecology of a high Andean stream, Rio Itambi, Otavalo, Ecuador. *Limnologica*, *33*(1), 29–43. <https://doi.org/10.1016/S0075-9511(03)80005-1>

Buytaert, W., Iñiguez, V., & Bièvre, B. De. (2007). The effects of afforestation and cultivation on water yield in the Andean páramo. *Forest Ecology and Management*, *251*(1–2), 22–30. <https://doi.org/10.1016/j.foreco.2007.06.035>

Calle, Z., Henao-Gallego, N., Giraldo, C., & Armbrecht, I. (2013). A comparison of vegetation and ground-dwelling ants in abandoned and restored gullies and landslide surfaces in the Western Colombian Andes. *Restoration Ecology*, *21*(6), 729–735. <https://doi.org/10.1111/rec.12001>

Carretier, S., Tolorza, V., Regard, V., Aguilar, G., Bermúdez, M. A., Martinod, J., Guyot, J. L., Hérail, G., & Riquelme, R. (2018). Review of erosion dynamics along the major N-S climatic gradient in Chile and perspectives. *Geomorphology*, *300*, 45–68. <https://doi.org/10.1016/j.geomorph.2017.10.016>

Carrion Mogollon, S. Y. (2018). *Evaluación de la intercuenca Alto Huallaga haciendo uso de la hidrología de bosques* (Pontificia Universidad Católica del Perú, Lima, Perú). <http://hdl.handle.net/20.500.12404/14598>

Caulfield, M. E., Fonte, S. J., Groot, J. C. J., Vanek, S. J., Sherwood, S., Oyarzun, P., Borja, R. M., Dumble, S., & Tittonell, P. (2020). Agroecosystem patterns and land management co-develop through environment, management, and land-use interactions. *Ecosphere*, *11*(4). <https://doi.org/10.1002/ecs2.3113>

Caulfield, M., Groot, J. C. J., Fonte, S. J., Sherwood, S., Oyarzun, P., Borja, R. M., Dumble, S., & Tittonell, P. (2020). Live barriers and associated organic amendments mitigate land degradation and improve crop productivity in hillside agricultural systems of the Ecuadorian Andes. *Land Degradation and Development*, *January*, 1–12. <https://doi.org/10.1002/ldr.3558>

Chipana Rivera, R., Moreno-Pérez, M. F., Velasco, R. C., & Roldán-Cañas, J. (2016). Performance of pre-hispanic irrigation systems in the Andean region of Bolivia. *Agricultural Water Management*, *170*, 180–188. <https://doi.org/10.1016/j.agwat.2015.11.010>

Clark, K. E., Hilton, R. G., West, A. J., Robles Caceres, A., Gröcke, D. R., Marthews, T. R., Ferguson, R. I., Asner, G. P., New, M., & Malhi, Y. (2017). Erosion of organic carbon from the Andes and its effects on ecosystem carbon dioxide balance. *Journal of Geophysical Research: Biogeosciences*, *122*(3), 449–469. <https://doi.org/10.1002/2016JG003615>

Clark, K. E., West, A. J., Hilton, R. G., Asner, G. P., Quesada, C. A., Silman, M. R., Saatchi, S. S., Farfan-Rios, W., Martin, R. E., Horwath, A. B., Halladay, K., New, M., & Malhi, Y. (2016). Storm-triggered landslides in the Peruvian Andes and implications for topography, carbon cycles, and biodiversity. *Earth Surface Dynamics*, *4*(1), 47–70. <https://doi.org/10.5194/esurf-4-47-2016>

Coppus, R., Imeson, A. C., & Sevink, J. (2003). Identification, distribution and characteristics of erosion sensitive areas in three different Central Andean ecosystems. *Catena*, *51*(3–4), 315–328. <https://doi.org/10.1016/S0341-8162(02)00169-8>

De Noni, Georges.; Viennot, Marc.; Asseline, Jean.; Trujillo, G. (2001). *Terres d’altitude, terres de risque*. IRD Editions.

de Valença, A. W., Vanek, S. J., Meza, K., Ccanto, R., Olivera, E., Scurrah, M., Lantinga, E. A., & Fonte, S. J. (2017). Land use as a driver of soil fertility and biodiversity across an agricultural landscape in the Central Peruvian Andes. *Ecological Applications*, *27*(4), 1138–1154. <https://doi.org/10.1002/eap.1508>

Dercon, G., Govers, G., Poesen, J., Sánchez, H., Rombaut, K., Vandenbroeck, E., Loaiza, G., & Deckers, J. (2007). Animal-powered tillage erosion assessment in the southern Andes region of Ecuador. *Geomorphology*, *87*(1–2), 4–15. <https://doi.org/10.1016/j.geomorph.2006.06.045>

Easdale, T. A., Sabat́e, S., & Grau, A. (2005). Don’t camp beside the river: Structure and dynamics of Andean alder (Alnus acuminata) forests affected by river floods, northwestern Argentina. *Revista Chilena de Historia Natural*, *78*(4), 161–178. <https://doi.org/10.4067/S0716-078X2005000400010>

Escobar Soldevilla, M. Y. (2019). *Mitigación de la erosión hídrica para la conservación del suelo en la subcuenca del río Ichu, Huancavelica* (Universidad Nacional Agraria La Molina, Lima, Perú). <http://repositorio.lamolina.edu.pe/handle/UNALM/4156>

Farrington, I. S. (1980). The archaeology of irrigation canals, with special reference to Peru. *World Archaeology*, *11*(3), 287–305. <https://doi.org/10.1080/00438243.1980.9979768>

Gallagher, R. S., Stehouwer, R. C., Barrera Mosquera, V. H., Alvarado Ochoa, S. P., Escudero López, L. O., Valverde, F., Portilla, A., Webber, K., & Domínguez Andrade, J. M. (2017). Yield and nutrient removal in potato-based conservation agriculture cropping systems in the high altitude andean region of Ecuador. *Agronomy Journal*, *109*(5), 1836–1848. <https://doi.org/10.2134/agronj2016.11.0635>

Goldstein, P. S., & Magilligan, F. J. (2011). Hazard, risk and agrarian adaptations in a hyperarid watershed: El Niño floods, streambank erosion, and the cultural bounds of vulnerability in the Andean Middle Horizon. *Catena*, *85*(2), 155–167. <https://doi.org/10.1016/j.catena.2010.11.001>

Goodbred, S. L., Dillehay, T. D., Galvéz Mora, C., & Sawakuchi, A. O. (2020). Transformation of maritime desert to an agricultural center: Holocene environmental change and landscape engineering in Chicama River valley, northern Peru coast. *Quaternary Science Reviews*, *227*, 1–13. <https://doi.org/10.1016/j.quascirev.2019.106046>

Goodman-Elgar, M. (2008). Evaluating soil resilience in long-term cultivation: a study of pre-Columbian terraces from the Paca Valley, Peru. *Journal of Archaeological Science*, *35*(12), 3072–3086. <https://doi.org/10.1016/j.jas.2008.06.003>

Guns, M., & Vanacker, V. (2013). Forest cover change trajectories and their impact on landslide occurrence in the tropical Andes. *Environmental Earth Sciences*, *70*(7), 2941–2952. <https://doi.org/10.1007/s12665-013-2352-9>

Guns, M., & Vanacker, V. (2014). Shifts in landslide frequency-area distribution after forest conversion in the tropical Andes. *Anthropocene*, *6*, 75–85. <https://doi.org/10.1016/j.ancene.2014.08.001>

Guzman, C. D., Hoyos-Villada, F., Da Silva, M., Zimale, F. A., Chirinda, N., Botero, C., Morales Vargas, A., Rivera, B., Moreno, P., & Steenhuis, T. S. (2019). Variability of soil surface characteristics in a mountainous watershed in Valle del Cauca, Colombia: Implications for runoff, erosion, and conservation. *Journal of Hydrology*, *576*(June), 273–286. <https://doi.org/10.1016/j.jhydrol.2019.06.002>

Harden, C. (1996). *Interrelationships between Land Abandonment and Land Degradation : A Case from the Ecuadorian Andes Author ( s ): Carol P . Harden Published by : International Mountain Society Stable URL :* [*https://www.jstor.org/stable/3673950*](https://www.jstor.org/stable/3673950) *REFERENCES Linked references*. *16*(3), 274–280.

Harden, C. (1998). Mesoscale Estimation of Soil Erosion in the Rio Ambato Drainage , Ecuadorian Sierra Author ( s ): Carol Harden Source : Mountain Research and Development , Vol . 8 , No . 4 , African Mountains and Highlands , Continued ( Nov ., 1988 ), pp . 331-341 Publis. *Mountain Research & Development*, *8*(4), 331–341.

Harden, C. P. (1993). Land use, soil erosion, and reservoir sedimentation in an Andean drainage basin in Ecuador. *Mountain Research & Development*, *13*(2), 177–184. <https://doi.org/10.2307/3673635>

Harden, Carol P. (2001). Soil Erosion and Sustainable Mountain Development. *Mountain Research and Development*, *21*(1), 77–83. [https://doi.org/10.1659/0276-4741(2001)021[0077:seasmd]2.0.co;2](https://doi.org/10.1659/0276-4741(2001)021%5b0077:seasmd%5d2.0.co;2)

Harden, Carol P. (2006). Human impacts on headwater fluvial systems in the northern and central Andes. *Geomorphology*, *79*(3–4), 249–263. <https://doi.org/10.1016/j.geomorph.2006.06.021>

Hartman, B. D., Bookhagen, B., & Chadwick, O. A. (2016). The effects of check dams and other erosion control structures on the restoration of Andean bofedal ecosystems. *Restoration Ecology*, *24*(6), 761–772. <https://doi.org/10.1111/rec.12402>

Hartman, B. D., Cleveland, D. A., & Chadwick, O. A. (2016). Linking changes in knowledge and attitudes with successful land restoration in indigenous communities. *Restoration Ecology*, *24*(6), 749–760. <https://doi.org/10.1111/rec.12347>

Henry, A., Mabit, L., Jaramillo, R. E., Cartagena, Y., & Lynch, J. P. (2013). Land use effects on erosion and carbon storage of the Río Chimbo watershed, Ecuador. *Plant and Soil*, *367*(1–2), 477–491. <https://doi.org/10.1007/s11104-012-1478-y>

Inbar, M., & Llerena, C. A. (2000). Erosion Processes in High Mountain Agricultural Terraces in Peru. *Mountain Research and Development*, *20*(1), 72–79. [https://doi.org/10.1659/0276-4741(2000)020[0072:epihma]2.0.co;2](https://doi.org/10.1659/0276-4741(2000)020%5b0072:epihma%5d2.0.co;2)

Jacobi, J., Schneider, M., Bottazzi, P., Pillco, M., Calizaya, P., & Rist, S. (2015). Agroecosystem resilience and farmers’ perceptions of climate change impacts on cocoa farms in Alto Beni, Bolivia. *Renewable Agriculture and Food Systems*, *30*(2), 170–183. <https://doi.org/10.1017/S174217051300029X>

Kirberg Sermini, D. J. (2014). *Estabilización de cárcavas con enmiendas orgánicas en la Región de Coquimbo* (Universidad de Chile, Santiago de Chile, Chile). <http://repositorio.uchile.cl/handle/2250/148784>

Knoke, T., Bendix, J., Pohle, P., Hamer, U., Hildebrandt, P., Roos, K., Gerique, A., Sandoval, M. L., Breuer, L., Tischer, A., Silva, B., Calvas, B., Aguirre, N., Castro, L. M., Windhorst, D., Weber, M., Stimm, B., Günter, S., Palomeque, X., … Beck, E. (2014). Afforestation or intense pasturing improve the ecological and economic value of abandoned tropical farmlands. *Nature Communications*, *5*. <https://doi.org/10.1038/ncomms6612>

Kraemer, N., Dercon, G., Cisneros, P., Arango Lopez, F., & Wellstein, C. (2019). Adding another dimension: Temporal development of the spatial distribution of soil and crop properties in slow-forming terrace systems. *Agriculture, Ecosystems and Environment*, *283*(May), 1–9. <https://doi.org/10.1016/j.agee.2019.05.002>

La Manna, L., Buduba, C. G., & Rostagno, C. M. (2016). Soil erodibility and quality of volcanic soils as affected by pine plantations in degraded rangelands of NW Patagonia. *European Journal of Forest Research*, *135*(4), 643–655. <https://doi.org/10.1007/s10342-016-0961-z>

La Manna, L., Gaspar, L., Rostagno, C. M., Quijano, L., & Navas, A. (2018). Soil changes associated with land use in volcanic soils of Patagonia developed on dynamic landscapes. *Catena*, *166*(March), 229–239. <https://doi.org/10.1016/j.catena.2018.03.025>

La Manna, L., Gaspar, L., Tarabini, M., Quijano, L., & Navas, A. (2019). 137Cs inventories along a climatic gradient in volcanic soils of Patagonia: Potential use for assessing medium term erosion processes. *Catena*, *181*(May), 104089. <https://doi.org/10.1016/j.catena.2019.104089>

La Torre Martinez, B. (1985). *Efecto de Sistemas de Cultivos sobre la Escorrentía, Erosión y Pérdida de Nutrientes en un Entisol de la Selva Alta - CAP José Santos Atahualpa - San Ramón - Chanchamayo* (Universidad Nacional Agraria La Molina, Lima, Perú). <http://repositorio.lamolina.edu.pe/handle/UNALM/1813>

Leihner, D. E., Ruppenthal, M., Hilger, T. H., & Castillo F., J. A. (1996). Soil Conservation Effectiveness and Crop Productivity of Forage Legume Intercropping, Contour Grass Barriers and Contour Ridging in Cassava on Andean Hillsides. *Experimental Agriculture*, *32*(3), 327–338. <https://doi.org/10.1017/s0014479700026260>

Locatelli, B., Homberger, J., Ochoa-tocachi, B. F., Bonnesoeur, V., Román, F., Drenkhan, F., & Buytaert, W. (2020). *Impactos de las zanjas de infiltración en el agua y los suelos: ¿Qué Sabemos?* (Issue May). <https://doi.org/10.13140/RG.2.2.26701.87528/1>

Loker, W. M., & Vosti, S. (1993). *Desarrollo Rural en la Amazonia Peruana*. CIAT Centro Internacional de Agricultura Tropical. <https://cgspace.cgiar.org/handle/10568/53962>

Londoño, A. C. (2008). Pattern and rate of erosion inferred from Inca agricultural terraces in arid southern Peru. *Geomorphology*, *99*(1–4), 13–25. <https://doi.org/10.1016/j.geomorph.2007.09.014>

Mainville, N., Webb, J., Lucotte, M., Davidson, R., Betancourt, O., Cueva, E., & Mergler, D. (2006). Decrease of soil fertility and release of mercury following deforestation in the Andean Amazon, Napo River Valley, Ecuador. *Science of the Total Environment*, *368*(1), 88–98. <https://doi.org/10.1016/j.scitotenv.2005.09.064>

Mc Innes Jara, K. E. (2010). *Evaluación de la retención y movimiento del agua del suelo en dos microcuencas del sector Alto Loica, Región Metropolitana, Chile* [Universidad de Chile, Santiago de Chile, Chile). <http://repositorio.uchile.cl/handle/2250/151615>

Molina, A., Govers, G., Van Den Putte, A., Poesen, J., & Vanacker, V. (2009). Assessing the reduction of the hydrological connectivity of gully systems through vegetation restoration: Field experiments and numerical modelling. *Hydrology and Earth System Sciences*, *13*(10), 1823–1836. <https://doi.org/10.5194/hess-13-1823-2009>

Molina, A., Vanacker, V., Brisson, E., Mora, D., & Balthazar, V. (2015). Multidecadal change in streamflow associated with anthropogenic disturbances in the tropical Andes. *Hydrology and Earth System Sciences*, *19*(10). <https://doi.org/10.5194/hess-19-4201-2015>

Molina, Armando, Govers, G., Cisneros, F., & Vanacker, V. (2009). Vegetation and topographic controls on sediment deposition and storage on gully beds in a degraded mountain area. *Earth Surface Processes and Landforms*, *34*(6), 755–767. <https://doi.org/10.1002/esp.1747>

Molina, Armando, Govers, G., Poesen, J., Van Hemelryck, H., De Bièvre, B., & Vanacker, V. (2008). Environmental factors controlling spatial variation in sediment yield in a central Andean mountain area. *Geomorphology*, *98*(3–4), 176–186. <https://doi.org/10.1016/j.geomorph.2006.12.025>

Molina, Armando, Govers, G., Vanacker, V., Poesen, J., Zeelmaekers, E., & Cisneros, F. (2007). Runoff generation in a degraded Andean ecosystem: Interaction of vegetation cover and land use. *Catena*, *71*(2), 357–370. <https://doi.org/10.1016/j.catena.2007.04.002>

Molina, Armando, Vanacker, V., Balthazar, V., Mora, D., & Govers, G. (2012). Complex land cover change, water and sediment yield in a degraded andean environment. *Journal of Hydrology*, *472*–*473*, 25–35. <https://doi.org/10.1016/j.jhydrol.2012.09.012>

Muenchow, J., Brenning, A., & Richter, M. (2012). Geomorphic process rates of landslides along a humidity gradient in the tropical Andes. *Geomorphology*, *139*–*140*, 271–284. <https://doi.org/10.1016/j.geomorph.2011.10.029>

Nanavati, W. P., French, C., Lane, K., Oros, O. H., & Beresford-Jones, D. (2016). Testing soil fertility of Prehispanic terraces at Viejo Sangayaico in the upper Ica catchment of south-central highland Peru. *Catena*, *142*, 139–152. <https://doi.org/10.1016/j.catena.2016.03.007>

Nordt, L., Hayashida, F., Hallmark, T., & Crawford, C. (2004). Late prehistoric soil fertility, irrigation management, and agricultural production in northwest coastal Peru. *Geoarchaeology*, *19*(1), 21–46. <https://doi.org/10.1002/gea.10102>

Ochoa-Tocachi, B. F., Bardales, J. D., Antiporta, J., Pérez, K., Acosta, L., Mao, F., Zulkafli, Z., Gil-Ríos, J., Angulo, O., Grainger, S., Gammie, G., De Bièvre, B., & Buytaert, W. (2019). Potential contributions of pre-Inca infiltration infrastructure to Andean water security. *Nature Sustainability*, *2*(7), 584–593. <https://doi.org/10.1038/s41893-019-0307-1>

Oscanoa Gamarra, L. L. (2016). *Influencia de las prácticas de conservación de suelos y mejora de la función hidrológica de praderas naturales altoandinas.* (Universidad Nacional Agraria La Molina, Lima, Perú). Retreived from <http://repositorio.lamolina.edu.pe/handle/UNALM/2843>

Otero, J. D., Figueroa, A., Muñoz, F. A., & Peña, M. R. (2011). Loss of soil and nutrients by surface runoff in two agro-ecosystems within an Andean paramo area. *Ecological Engineering*, *37*(12), 2035–2043. <https://doi.org/10.1016/j.ecoleng.2011.08.001>

Pastor Jauregui, R. del P. (1992). *Evaluación de la Erosión Hídrica en la Zona de Chanchamayo-Junín 4 utilizando como cobertura Vegetal el Cultivo de Camote (lpomoea batatas L.)* (Universidad Nacional Agraria La Molina, Lima, Perú). <http://repositorio.lamolina.edu.pe/handle/UNALM/1840>

Pepin, E., Carretier, S., Guyot, J. L., & Escobar, F. (2010). Flux spécifiques de sédiments en suspension des rivières Andines du Chili et leur corrélation avec le climat, la pente et la végétation. *Hydrological Sciences Journal*, *55*(7), 1190–1205. <https://doi.org/10.1080/02626667.2010.512868>

Perrin, J. L., Bouvier, C., Janeau, J. L., Ménez, G., & Cruz, F. (2001). Rainfall/runoff processes in a small peri-urban catchment in the Andes Mountains. The Rumihurcu Quebrada, Quito (Ecuador). *Hydrological Processes*, *15*(5), 843–854. <https://doi.org/10.1002/hyp.190>

Pizarro, J., Vergara, P. M., Morales, J. L., Rodríguez, J. A., & Vila, I. (2014). Influence of land use and climate on the load of suspended solids in catchments of Andean rivers. *Environmental Monitoring and Assessment*, *186*(2), 835–843. <https://doi.org/10.1007/s10661-013-3420-z>

Podwojewski, P., Poulenard, J., Zambrana, T., & Hofstede, R. (2002). Overgrazing effects on vegetation cover and properties of volcanic ash soil in the pa. *Soil Use and Management*, *18*, 45–55. <https://doi.org/10.1079/SUM2001100>

Portocarrero Gallardo, J. M. (2018). *Efectos Del Control De Erosión En La Recuperación De Ecosistemas – Estudio De Caso Laguna Canrash,- Provincia De Huari, Ancash, Perú* (Universidad Nacional Agraria La Molina, Lima, Perú). <http://repositorio.lamolina.edu.pe/handle/UNALM/3551>

Posthumus, H., & Stroosnijder, L. (2010). To terrace or not: The short-term impact of bench terraces on soil properties and crop response in the Peruvian Andes. *Environment, Development and Sustainability*, *12*(2), 263–276. <https://doi.org/10.1007/s10668-009-9193-4>

Posthumus, Helena, & De Graaff, J. (2005). Cost-benefit analysis of bench terraces, a case study in Peru. *Land Degradation and Development*, *16*(1), 1–11. <https://doi.org/10.1002/ldr.637>

Quintero, M., Estrada, R. D., & Giron, E. (2005). *Mecanismos de pago por servicios ambientales en la region de moyobamba. Estudio Piloto: Microcuencas Miskiyacu y Rumiyacu.* Proyecto Cuencas Andinas GTZ - CONDESAN – CIAT. <https://cgspace.cgiar.org/handle/10568/21929>

Quispe Ojeda, T. C. (2018). *Influencia De La Cobertura Vegetal En La Erosión Hídrica Del Suelo En La Comunidad De San Mateo, Perú* (Universidad Nacional Agraria La Molina, Lima, Perú). <http://repositorio.lamolina.edu.pe/handle/UNALM/3600>

Restrepo, J. D., & Kjerfve, B. (2000). Magdalena river: Interannual variability (1975-1995) and revised water discharge and sediment load estimates. *Journal of Hydrology*, *235*(1–2), 137–149. <https://doi.org/10.1016/S0022-1694(00)00269-9>

Ripley, S. W., Krzic, M., Bradfield, G. E., & Bomke, A. (2010). Land-use impacts on selected soil properties of the Yungas/Chaco transition forest of Jujuy province, northwestern Argentina: A preliminary study. *Canadian Journal of Soil Science*, *90*(4), 679–683. <https://doi.org/10.4141/CJSS09101>

Rodrigues, L., Lombardo, U., Trauerstein, M., Huber, P., Mohr, S., & Veit, H. (2016). An insight into pre-Columbian raised fields: The case of San Borja, Bolivian lowlands. *Soil*, *2*(3), 367–389. <https://doi.org/10.5194/soil-2-367-2016>

Rolando, J. L., Dubeux, J. C., Perez, W., Ramirez, D. A., Turin, C., Ruiz-Moreno, M., Comerford, N. B., Mares, V., Garcia, S., & Quiroz, R. (2017). Soil organic carbon stocks and fractionation under different land uses in the Peruvian high-Andean Puna. *Geoderma*, *307*(March), 65–72. <https://doi.org/10.1016/j.geoderma.2017.07.037>

Roldán-Cañas, J., Chipana, R., Moreno-Pérez, M. F., & Chipana, G. (2015). Description and evaluation of zigzag furrow irrigation in the inter-Andean Valleys of Bolivia. *Journal of Irrigation and Drainage Engineering*, *141*(11), 1–10. <https://doi.org/10.1061/(ASCE)IR.1943-4774.0000902>

Romero-Díaz, A., De Vente, J., & Díaz-Pereira, E. (2019). Evaluación de los servicios ecosistémicos proporcionados por las terrazas agrícolas. *Pirineos*, *174*, 043. <https://doi.org/10.3989/pirineos.2019.174003>

Rymshaw, E., Walter, M. F., & Van Wambeke, A. (1997). Processes of soil movement on steep cultivated hill slopes in the Venezuelan Andes. *Soil and Tillage Research*, *44*(3–4), 265–272. <https://doi.org/10.1016/S0167-1987(97)00055-X>

Sanchez, L. A. (2002). Soil erosion under different vegetation covers in the Venezuelan Andes. *Environmentalist*, *22*(2), 161–172. <https://doi.org/10.1023/A:1015389918416>

Sarmiento, L. (2000). Water Balance and Soil Loss Under Long Fallow Agriculture in the Venezuelan Andes. *Mountain Research and Development*, *20*(3), 246–253. [https://doi.org/10.1659/0276-4741(2000)020[0246:wbaslu]2.0.co;2](https://doi.org/10.1659/0276-4741(2000)020%5b0246:wbaslu%5d2.0.co;2)

Sarmiento, L., Smith, J. K., Márquez, N., Escalona, A., & Erazo, M. C. (2015). Constraints for the restoration of tropical alpine vegetation on degraded slopes of the Venezuelan Andes. *Plant Ecology and Diversity*, *8*(2), 277–291. <https://doi.org/10.1080/17550874.2014.898163>

Segnini, A., de Souza, A. A., Novotny, E. H., Milori, D. M. B. P., da Silva, W. T. L., Bonagamba, T. J., Posadas, A., & Quiroz, R. (2013). Characterization of Peatland Soils from the High Andes through 13 C Nuclear Magnetic Resonance Spectroscopy . *Soil Science Society of America Journal*, *77*(2), 673–679. <https://doi.org/10.2136/sssaj2012.0291>

Segnini, A., Posadas, A., Quiroz, R., Milori, D. M. B. P., Saab, S. C., Neto, L. M., & Vaz, C. M. P. (2010). Spectroscopic Assessment of Soil Organic Matter in Wetlands from the High Andes. *Soil Science Society of America Journal*, *74*(6), 2246–2253. <https://doi.org/10.2136/sssaj2009.0445>

Seminario Berrezuela, M. O., & Pesantez Pacheco, P. G. (2010). *Identificación de zonas degradadas y en proceso de erosión* (Universidad de Cuenca, Cuenca, Ecuador). <http://dspace.ucuenca.edu.ec/handle/123456789/3027>

Sepúlveda, S. A., Moreiras, S. M., Lara, M., & Alfaro, A. (2014). Debris flows in the Andean ranges of central Chile and Argentina triggered by 2013 summer storms: characteristics and consequences. *Landslides*, *12*(1), 115–133. <https://doi.org/10.1007/s10346-014-0539-0>

Suescún, D., Villegas, J. C., León, J. D., Flórez, C. P., García-Leoz, V., & Correa-Londoño, G. A. (2017). Vegetation cover and rainfall seasonality impact nutrient loss via runoff and erosion in the Colombian Andes. *Regional Environmental Change*, *17*(3), 827–839. <https://doi.org/10.1007/s10113-016-1071-7>

Tolorza, V., Carretier, S., Andermann, C., Ortega-Culaciati, F., Pinto, L., & Mardones, M. (2014). Contrasting mountain and piedmont dynamics of sediment discharge associated with groundwater storage variation in the Biobío River. *Journal of Geophysical Research F: Earth Surface*, *119*(12), 2730–2753. <https://doi.org/10.1002/2014JF003105>

Torero Zegarra, E., Pender, J., Maruyama, E., Keefe, M. and Stoorvogel, J, M. (2010). Socioeconomic and technical considerations to mitigate land and water degradation in the Peruvian Andes. CGIAR Challenge Program on Water and Food. <https://cgspace.cgiar.org/handle/10568/3866>

Vanacker, V., Govers, G., Barros, S., Poesen, J., & Deckers, J. (2003). The effect of short-term socio-economic and demographic change on landuse dynamics and its corresponding geomorphic response with relation to water erosion in a tropical mountainous catchment, Ecuador. *Landscape Ecology*, *18*(1), 1–15. <https://doi.org/10.1023/A:1022902914221>

Vanacker, V., Govers, G., Poesen, J., Deckers, J., Dercon, G., & Loaiza, G. (2003). The impact of environmental change on the intensity and spatial pattern of water erosion in a semi-arid mountainous Andean environment. *Catena*, *51*(3–4), 329–347. <https://doi.org/10.1016/S0341-8162(02)00172-8>

Vanacker, V., Guns, M., Clapuyt, F., Balthazar, V., Tenorio, G., & Molina, A. (2020). Distribución espacio-temporal de los deslizamientos y erosión hídrica en una cuenca Andina tropical. *Pirineos*, *175*(2020), 051. <https://doi.org/10.3989/pirineos.2020.175001>

Vanacker, V., Molina, A., Govers, G., Poesen, J., & Deckers, J. (2007). Spatial variation of suspended sediment concentrations in a tropical Andean river system: The Paute River, southern Ecuador. *Geomorphology*, *87*(1–2), 53–67. <https://doi.org/10.1016/j.geomorph.2006.06.042>

Vanacker, V., Molina, A., Govers, G., Poesen, J., Dercon, G., & Deckers, S. (2005). River channel response to short-term human-induced change in landscape connectivity in Andean ecosystems. *Geomorphology*, *72*(1–4), 340–353. <https://doi.org/10.1016/j.geomorph.2005.05.013>

Vanacker, V., Vanderschaeghe, M., Govers, G., Willems, E., Poesen, J., Deckers, J., & De Bievre, B. (2003). Linking hydrological, infinite slope stability and land-use change models through GIS for assessing the impact of deforestation on slope stability in high Andean watersheds. *Geomorphology*, *52*(3–4), 299–315. <https://doi.org/10.1016/S0169-555X(02)00263-5>

Vanacker, V., von Blanckenburg, F., Govers, G., Molina, A., Poesen, J., Deckers, J., & Kubik, P. (2007). Restoring dense vegetation can slow mountain erosion to near natural benchmark levels. *Geology*, *35*(4), 303–306. <https://doi.org/10.1130/G23109A.1>

Vanek, S. J., & Drinkwater, L. E. (2013). Environmental, Social, and Management Drivers of Soil Nutrient Mass Balances in an Extensive Andean Cropping System. *Ecosystems*, *16*(8), 1517–1535. <https://doi.org/10.1007/s10021-013-9699-3>

Vásquez, A., & Tapia, M. (2011). Cuantificación de la erosión hídrica superficial en las laderas semiáridas de la Sierra Peruana. *Revista INGENIERÍA UC*, *18*(3), 42–50. <https://www.redalyc.org/articulo.oa?id=70723269005>

Velásquez Castro, K. B. (2019). *Análisis de los potenciales problemas de sedimentación y medidas de mitigación en la presa palo redondo* (Pontificia Universidad Católica del Perú, Lima, Perú). <http://hdl.handle.net/20.500.12404/14599>

Villa, J. A., Mejía, G. M., Velásquez, D., Botero, A., Acosta, S. A., Marulanda, J. M., Osorno, A. M., & Bohrer, G. (2019). Carbon sequestration and methane emissions along a microtopographic gradient in a tropical Andean peatland. *Science of the Total Environment*, *654*, 651–661. <https://doi.org/10.1016/j.scitotenv.2018.11.109>

Villar Cabeza, M. Á., Cuellar Bautista, J. E., & Valentin Castañeda, S. L. (2014). *Valoración técnica, económica y ambiental Manejo eficiente de los recursos forestales y de fauna silvestre* (Primera ed). INIA Instituto Nacional de Innovación Agraria. <http://repositorio.inia.gob.pe/handle/inia/376>

White, S., & Maldonado, F. (1991). The Use and Conservation of Natural Resources in the Andes of Southern Ecuador. *Mountain Research and Development*, *11*(1), 37–55.

Zavala, B., Hermanns, R., Valderrama, P., Costa, C., & Rosado, M. (2009). Geological process and INQUA macro-seismic intensity scale of Pisco earthquake 15/08/2007, Perú. *Revista de La Asociacion Geologica Argentina*, *65*(4), 760–779.

Zimmerer, K. S. (1995). The origins of andean irrigation. *Nature*, *378*(6556), 481–483. <https://doi.org/10.1038/378481a0>

Zúñiga Huaco, J. E. (2017). *Determinación de la pérdida de suelos en la cuenca aportante del embalse Aguada Blanca - Arequipa aplicando USLE y técnicas geoespaciales* (Universidad Nacional Agraria La Molina, Lima, Perú). <http://repositorio.lamolina.edu.pe/handle/UNALM/3072>
