# Supplementary material for: The effect of natural infrastructure on water erosion mitigation in the Andes
Source: Copernicus journal article supplement (doi:10.5194/soil-8-133-2022), 2022-02-28
Supplement: Supplementary file 5 [file Supplement E.docx]

## Supplement E. Test library of 20 references

Bathurst, J. C., Amezaga, J., Cisneros, F., Gaviño Novillo, M., Iroumé, A., Lenzi, M. A., Mintegui Aguirre, J., Miranda, M., & Urciuolo, A. (2010). Forests and floods in Latin America: Science, management, policy and the EPIC FORCE project. *Water International*, *35*(2), 114–131. <https://doi.org/10.1080/02508061003660714>

Bonnesoeur, V., Locatelli, B., Guariguata, M.R., Ochoa-Tocachi, B.F., Vanacker, V., Mao, Z., Stokes, A., Mathez-Stiefel, S.-L. (2019). Impacts of forests and forestation on hydrological services in the Andes: A systematic review. *Forest Ecology and Management*, 433, 569-584. <https://doi.org/10.1016/j.foreco.2018.11.033>

Borja, P., Molina, A., Govers, G., & Vanacker, V. (2018). Check dams and afforestation reducing sediment mobilization in active gully systems in the Andean mountains. *Catena*, *165*, 42–53. <https://doi.org/10.1016/j.catena.2018.01.013>

Dehn, M., 1995. An evaluation of soil conservation techniques in the Ecuadorian Andes. Mountain Research and Development, 15 (2), 175-182. <https://doi.org/10.2307/3673880>

Guns, M., & Vanacker, V. (2013). Forest cover change trajectories and their impact on landslide occurrence in the tropical Andes. *Environmental Earth Sciences*, *70*(7), 2941–2952. <https://doi.org/10.1007/s12665-013-2352-9>

Molina, Armando, Vanacker, V., Balthazar, V., Mora, D., & Govers, G. (2012). Complex land cover change, water and sediment yield in a degraded andean environment. *Journal of Hydrology*, *472*–*473*, 25–35. <https://doi.org/10.1016/j.jhydrol.2012.09.012>

Monar, C., Saavedra, A.K., Escudero, L., Delgado, J.A., Alwang, J., Barrera, V., Botello, R. (2013). Positive impacts in soil and water conservation in an Andean region of South America: Case scenarios from a US Agency for International Development multidisciplinary cooperative Project. *Journal of Soil and Water Conservation*, 68 (1), 25A-30A.

Posthumus, H., & Stroosnijder, L. (2010). To terrace or not: The short-term impact of bench terraces on soil properties and crop response in the Peruvian Andes. *Environment, Development and Sustainability*, *12*(2), 263–276. <https://doi.org/10.1007/s10668-009-9193-4>

Restrepo, J.D., Syvitski, J.P.M. (2006). Assessing the effect of natural controls and land use change on sediment yield in a major Andean River: The Magdalena Drainage Basin, Colombia. *Ambio* 35 (2), 65-74.

Restrepo, J.D., Escobar, H.A. (2018). Sediment load trends in the Magdalena River basin (1980–2010): Anthropogenic and climate-induced causes. *Geomorphology* 302, 76-91.

Southgate, D. and R. Macke (1989). The downstream benefits of soil conservation in third world hydroelectric watersheds. *Land Economics* 65: 38–48.

Vanacker, V., Vanderschaeghe, M., Govers, G., Willems, E., Poesen, J., Deckers, J., & De Bievre, B. (2003). Linking hydrological, infinite slope stability and land-use change models through GIS for assessing the impact of deforestation on slope stability in high Andean watersheds. *Geomorphology*, *52*(3–4), 299–315. <https://doi.org/10.1016/S0169-555X(02)00263-5>

Vanacker, V., von Blanckenburg, F., Govers, G., Molina, A., Poesen, J., Deckers, J., & Kubik, P. (2007). Restoring dense vegetation can slow mountain erosion to near natural benchmark levels. *Geology*, *35*(4), 303–306. <https://doi.org/10.1130/G23109A.1>

White, S., & Maldonado, F. (1991). The Use and Conservation of Natural Resources in the Andes of Southern Ecuador. *Mountain Research and Development*, *11*(1), 37–55.

Winters, P., Crissmann, C.C., Espinosa, P. (2004). Inducing the adoption of conservation technologies: lessons from the Ecuadorian Andes. *Environment and Development Economics* 9, 695–719. <https://doi.org/10.1017/S1355770X04001482>
