# Supplementary material for: The effect of natural infrastructure on water erosion mitigation in the Andes
Source: Copernicus journal article supplement (doi:10.5194/soil-8-133-2022), 2022-02-28
Supplement: Supplementary file [file soil-8-133-2022-supplement-title-page.pdf › soil-8-133-2022-supplement-title-page.pdf]

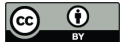

## *Supplement of*

# **The effect of natural infrastructure on water erosion mitigation in the Andes**

**Veerle Vanacker et al.**

*Correspondence to:* Veerle Vanacker ([veerle.vanacker@ulouvain.be](mailto:veerle.vanacker@ulouvain.be))

- [soil-8-133-2022-supplement-title-page.pdf](#)
- [Supplement A.docx](#)
- [Supplement B.xlsx](#)
- [Supplement C.xlsx](#)
- [Supplement D.docx](#)
- [Supplement E.docx](#)

The copyright of individual parts of the supplement might differ from the article licence.
